1 **ATR kinase inhibition induces thymineless death in proliferating CD8<sup>+</sup> T cells**

2

3 Norie Sugitani<sup>1</sup>, Frank P. Vendetti<sup>1</sup>, Andrew J. Cipriano<sup>1</sup>, Joshua J. Deppas<sup>2</sup>, Tatiana N. Moiseeva<sup>3</sup>,  
4 Sandra Schamus-Haynes<sup>1</sup>, Yiyang Wang<sup>4</sup>, Drake Palmer<sup>5</sup>, Hatice U. Osmanbeyoglu<sup>6</sup>, Anna  
5 Bostwick<sup>7</sup>, Nathaniel W. Snyder<sup>7</sup>, Yi-Nan Gong<sup>4</sup>, Katherine M. Aird<sup>8</sup>, Greg M. Delgoffe<sup>4</sup>, Jan H.  
6 Beumer<sup>2,9</sup>, and Christopher J. Bakkenist<sup>1,8</sup>

7

8 <sup>1</sup>Department of Radiation Oncology, UPMC Hillman Cancer Center, School of Medicine,  
9 University of Pittsburgh, Pittsburgh, Pennsylvania, PA

10 <sup>2</sup>Department of Pharmaceutical Sciences, School of Pharmacy, University of Pittsburgh,  
11 Pittsburgh, PA

12 <sup>3</sup>Tallinn University of Technology, Department of Chemistry and Biotechnology, Tallinn, Estonia

13 <sup>4</sup>Department of Immunology, UPMC Hillman Cancer Center, School of Medicine, University of  
14 Pittsburgh, Pittsburgh, Pennsylvania, PA

15 <sup>5</sup>UPMC Hillman Cancer Center, Department of Medicine, University of Pittsburgh School of  
16 Medicine, Pittsburgh, PA

17 <sup>6</sup>Department of Biomedical Informatics, UPMC Hillman Cancer Center, School of Medicine,  
18 University of Pittsburgh, Pittsburgh, Pennsylvania, PA

19 <sup>7</sup>Lewis Katz School of Medicine at Temple University, Center for Metabolic Disease Research,  
20 Department of Cardiovascular Sciences, Philadelphia, PA USA

21 <sup>8</sup>Department of Pharmacology and Chemical Biology, UPMC Hillman Cancer Center, School of  
22 Medicine, University of Pittsburgh, Pittsburgh, Pennsylvania, PA

23 <sup>9</sup>Division of Hematology-Oncology, UPMC Hillman Cancer Center, Department of Medicine,  
24 University of Pittsburgh School of Medicine, Pittsburgh, PA

25

26 **SUMMARY**

27 **ATR kinase is a central regulator of the DNA damage response (DDR) and cell cycle checkpoints.**  
28 **However, little is known about the role of ATR in the cell cycle and the impact of DDR inhibitors**  
29 **in immune cells in the absence of DNA damage. We previously showed that the ATR inhibitor**  
30 **AZD6738 (ATRi) combines with radiation to generate delayed, CD8<sup>+</sup> T cell-dependent antitumor**  
31 **responses in mouse models of cancer. Here, we show that ATRi induces untimely CDK1 activity**  
32 **during S phase in CD8<sup>+</sup> T cells and this induces origin firing and simultaneous degradation of**  
33 **dNTP synthesis and salvage enzymes. These pleiotropic effects of ATRi in proliferating CD8<sup>+</sup> T**  
34 **cells induce deoxyuridine contamination in genomic DNA, R loops, RNA-DNA polymerase**  
35 **collisions, and death. Remarkably, thymidine significantly rescues ATRi-induced CD8<sup>+</sup> T cell**  
36 **death. Our data identifies critical considerations for the design of clinical ATRi regimens with**  
37 **genotoxic chemo- and radiation and immunotherapies.**

38

39 **KEYWORDS**

40 ATR/CD8<sup>+</sup> T cells/origin firing/deoxyuridine contamination/thymineless death

41

## 42 **INTRODUCTION**

43 Most chemotherapies target DNA replication forks and their efficacy is associated with both the  
44 direct killing of proliferating tumor cells and, in many cases, the stimulation of innate and  
45 adaptive anti-tumor immune responses (Bracci et al., 2014; O'Connor, 2015). One mechanism  
46 through which DNA damaging chemotherapies increase anti-tumor immune responses is the  
47 direct killing of proliferating immune cells causing transient leukocytopenia followed by a  
48 rebound proliferation of immune cell populations. A major clinical goal is to identify novel  
49 regimens that maximize the direct killing of tumor cells, while concurrently selecting for and  
50 stimulating the activity of anti-tumor immune effector cells.

51 The DNA Damage Response (DDR) is a signaling system that integrates nucleic acid metabolism  
52 and DNA repair with the cell cycle to safeguard genome stability (Ciccia and Elledge, 2010). DDR  
53 inhibitors (DDRi) have been developed to target tumors that have acquired inactivating  
54 mutations in a DNA repair pathway and to potentiate direct tumor cell killing by DNA damaging  
55 chemotherapies and radiotherapy. For example, Olaparib (Lynparza), the poly (ADP-ribose)  
56 polymerase (PARP) inhibitor, is approved for the treatment of tumors harboring BRCA1 or BRCA2  
57 mutations. More recently, four ATR kinase inhibitors (we use the abbreviation ATRi's for these  
58 four inhibitors) have advanced to phase 1 and phase 2 trials: ceralasertib (AZD6738); berzosertib  
59 (M6620, VX-970); elimusertib (BAY 1895344); and RP-3500 (Foote et al., 2018; Hall et al., 2014;  
60 Roulston et al., 2021; Wengner et al., 2020). ATRi's potentiate chemotherapies that target DNA  
61 replication forks, selectively kill tumor cells with inactivating mutations in ATM, ERCC1, RNASE  
62 H2, and XRCC1, and block the upregulation of PD-L1 after radiation (Hustedt et al., 2019; Mohni  
63 et al., 2015; Roulston *et al.*, 2021; Sato et al., 2017; Vendetti et al., 2018; Vendetti et al., 2015;  
64 Wang et al., 2019). Phase I clinical trial data show that ATRi's suppress circulating monocytes and  
65 proliferating T cells, and that these populations rebound after cessation of ATRi's, as expected  
66 (Krebs et al., 2018). However, ATR inhibitor AZD6738 (we use the abbreviation ATRi for AZD6738)  
67 unexpectedly combines with radiation to generate delayed, CD8<sup>+</sup> T cell-dependent responses in  
68 mouse models of cancer (Vendetti *et al.*, 2018). These preclinical and clinical findings suggest that  
69 the direct impact of ATRi in immune cells is clinically important and warrants further investigation.

70 ATR is an essential kinase that is activated at regions of single-stranded DNA that are generally  
71 associated with stalled and collapsed DNA replication forks and resected DNA double strand  
72 breaks (Brown and Baltimore, 2000; Cortez et al., 2001; Zou and Elledge, 2003). ATR kinase  
73 phosphorylates and activates a second essential kinase, CHK1, that phosphorylates the CDC25A  
74 phosphatase causing its degradation in the proteasome after DNA damage (Liu et al., 2000;  
75 Mailand et al., 2000; Sanchez et al., 1997). Since CDC25A removes inhibitory phosphorylations  
76 on the cyclin-dependent kinases CDK2 and CDK1 facilitating the G1/S and G2/M transitions,  
77 respectively, CDC25A degradation induces cell cycle arrest (Hoffmann et al., 1994). While the role  
78 of CDC25A degradation in cell cycle arrest after DNA damage is well-accepted, CDC25A is a  
79 dynamic protein and the ATR-CHK1-CDC25A signaling axis has also been implicated in progression  
80 through S phase in unperturbed cells (Sorensen et al., 2004). Whether ATR-CHK1-CDC25A  
81 signaling limits origin firing through S phase to prevent replication fork stalling or repairs  
82 replication forks stalled at endogenous DNA lesions or following mechanical failure in  
83 unperturbed cells is not known.

84 ATRi induce origin firing across active replicons in human cancer cells and fibroblasts (Couch et  
85 al., 2013; Kwok et al., 2016; Moiseeva et al., 2017; Moiseeva et al., 2019b). However, the  
86 physiological and clinical significance of this signaling mechanism has not been established.  
87 Computational models of the spatiotemporal pattern of origin firing point to an unknown  
88 mechanism that limits additional origin firing within ~7–120 kb of an origin that fires (Lob et al.,  
89 2016). Since the ~50,000 origins that replicate the human genome are generated from an excess  
90 of ~500,000 licensed origins, we hypothesized that the first origin firing event within a replicon  
91 may be stochastic and that ATR-CHK1-CDC25A signaling may then limit additional origin firing  
92 across active replicons generating dormant or flexible origins that are passively replicated  
93 (Mahbubani et al., 1997; Sorensen *et al.*, 2004). We further hypothesized that, through limiting  
94 origin firing across active replicons, ATR-CHK1-CDC25A signaling may accommodate the supply  
95 of dNTPs which is 50-fold less than that required to synthesize the genome in a human epithelial  
96 cell (Ferraro et al., 2010).

97 To test these hypotheses in a clinically important model, we interrogated the impact of ATRi in  
98 CD8<sup>+</sup> T cells *ex vivo*. We show that ATRi induces deoxyuridine (dU) contamination in genomic



99 DNA, R loops, RNA-DNA polymerase collisions, and death in proliferating, but not naïve CD8<sup>+</sup> T  
100 cells. Remarkably, we show that thymidine significantly rescues ATRi-induced CD8<sup>+</sup> T cell death.  
101 Our results have far-reaching implications for the design of clinical trials combining ATRi with  
102 immunotherapies and/or antimetabolites and suggest that dose limiting toxicity in active clinical  
103 trials of ATRi may be associated with leukocytopenia caused by thymineless cell death.

## 104 **RESULTS**

### 105 **ATR kinase is essential in proliferating CD8<sup>+</sup> T cells *ex vivo***

106 To study the impact of ATRi on the activation, proliferation, and survival of CD8<sup>+</sup> T cells, we used  
107 *ex vivo* activated CD8<sup>+</sup> T cells derived from spleens and lymph nodes of C57BL/6 and Pmel-1 mice.  
108 We used Pmel-1 CD8<sup>+</sup> T cells activated with the synthetic peptide gp100 in splenocytes when the  
109 experimental endpoint allowed the identification of CD8<sup>+</sup> T cells. We used CD8<sup>+</sup> T cells activated  
110 with CD3E and CD28 antibodies after purification by negative selection when contaminating cells  
111 could compromise the experimental endpoint.

112 To confirm the kinetics of activation and proliferation of CD8<sup>+</sup> T cells *ex vivo*, we used a flow  
113 cytometry assay of cell trace violet (CTV) dye dilution. CD8<sup>+</sup> T cells were fully activated (CD44<sup>hi</sup>)  
114 at ~21 h and started dividing at ~24 h (Figure 1A). Once activated, CD8<sup>+</sup> T cells divided 4-5 times  
115 from 24-48 h, consistent with a previous report (Yoon et al., 2010). To determine whether the  
116 activation of CD8<sup>+</sup> T cells was associated with increased expression of DDR and replication  
117 proteins, we generated whole cell extracts from CD8<sup>+</sup> T cells at 0 h and 30 h. Empirically we found  
118 that ATM could be used to normalize the naïve and proliferating CD8<sup>+</sup> T cells proteomes (Figure  
119 1B). ATR and deoxycytidine kinase (DCK) were expressed in naïve CD8<sup>+</sup> T cells and induced  
120 significantly in proliferating CD8<sup>+</sup> T cells. CHK1, the ribonucleotide reductase subunits RRM1 and  
121 RRM2, deoxyuridine 5'-triphosphate nucleotidohydrolase (DUT), and WEE1 were expressed at  
122 the limits of detection in naïve CD8<sup>+</sup> T cells and highly expressed in proliferating CD8<sup>+</sup> T cells.

123 To determine whether ATR kinase activity is required for the activation and proliferation of CD8<sup>+</sup>  
124 T cells, we treated CD8<sup>+</sup> T cells with ATRi (Foote *et al.*, 2018) from 0-24 h (during activation) or  
125 24-48 h (during proliferation) and monitored survival using the viability dye eFluor 780. While  
126 ATRi had little impact on CD8<sup>+</sup> T cells from 0-24 h, ATRi from 24-48 h induced death in most

127 proliferating CD8<sup>+</sup> T cells (Figure 1C). We then examined whether ATRi affects the survival of  
128 unactivated, naïve CD8<sup>+</sup> T cells maintained in interleukin 7 (IL-7). While ATRi caused a slight  
129 decrease in the survival of naïve CD8<sup>+</sup> T cells from 0-24 h, ATRi from 24-48 h had no impact (Figure  
130 1D). IL-7 can promote homeostatic proliferation and this may explain why ATRi caused a slight  
131 decrease in the survival of CD8<sup>+</sup> T cells from 0-24 h (Tan et al., 2001). We also determined  
132 whether a 24h treatment with ATRi impacts the survival of exponentially dividing B16 cancer cells  
133 and primary fibroblasts (Figure 1E). ATRi did not induce significant cell death in B16 or primary  
134 fibroblasts in 24 h. Finally, we determined whether clinical inhibitors of ATM (AZD0156), PARP  
135 (Olaparib), and WEE1 (AZD1775) induced death in proliferating CD8<sup>+</sup> T cells. Neither AZD0156 nor  
136 AZD1775 induced death in proliferating CD8<sup>+</sup> T cells in 24 h (Figure 1F). While Olaparib induced  
137 statistically significant death in proliferating CD8<sup>+</sup> T cells, this was not comparable with ATRi  
138 which induced death in most proliferating CD8<sup>+</sup> T cells in 24 h.

### 139 **ATR kinase is essential in previously activated, proliferating CD8<sup>+</sup> T cells *in vivo*.**

140 ATRi potentiates CD8<sup>+</sup> T cell-dependent anti-tumor activity following conformal radiation in  
141 syngeneic CT26 colorectal tumors, despite transiently reducing activated CD8<sup>+</sup> T cells in BALB/c  
142 host spleens (Vendetti *et al.*, 2018). To define the impact of ATRi on CD8<sup>+</sup> T cell activation and  
143 proliferation *in vivo*, we treated CT26 tumor-bearing mice with 75 mg/kg of ATRi on days 1,2, and  
144 3, and immunoprofiled CD8<sup>+</sup> T cells in tumor infiltrating lymphocytes (TIL) and the periphery  
145 (spleen and draining lymph node (DLN)) on day 4. CD8<sup>+</sup> T cell numbers decreased in TIL in mice  
146 treated with ATRi (Figure 2A). Relative CD8<sup>+</sup> T cell numbers were not changed in the periphery by  
147 ATRi. However, spleen weight decreased in mice treated with ATRi (Figure S1A). Importantly, the  
148 percentage of proliferating CD8<sup>+</sup> T cells (Ki67<sup>+</sup>) significantly decreased in TIL, spleen, and DLN in  
149 mice treated with ATRi (Figure 2B,C). Thus, ATRi impacts proliferating CD8<sup>+</sup> T cells *in vivo* in all  
150 immunoprofiled tissues.

151 To determine whether ATRi impedes CD8<sup>+</sup> T cell activation *in vivo*, we examined expression of  
152 the early activation marker CD69 on CD8<sup>+</sup> T cells in the TIL and periphery. The percentage of  
153 newly or recently activated CD8<sup>+</sup> T cells (CD69<sup>+</sup>) was increased in TIL in mice treated with ATRi  
154 (Figure 2D). The percentage of recently activated CD8<sup>+</sup> T cells (CD69<sup>+</sup>) in the periphery was not  
155 changed by ATRi. We further probed CD8<sup>+</sup> T cell activation phenotypes using the markers CD62L

156 and CD44 to identify un-activated naïve (TN, CD26L<sup>lo</sup> CD44<sup>lo</sup>) CD8<sup>+</sup> T cells and activated central  
157 memory (TCM, CD26L<sup>hi</sup> CD44<sup>hi</sup>) and effector/effector memory (TEM, CD26L<sup>lo</sup> CD44<sup>hi</sup>) CD8<sup>+</sup> T cells  
158 in the TIL and periphery. Consistent with our previous findings (Vendetti et al., 2018), ATRi  
159 reduced the percentage of activated TCM and TEM CD8<sup>+</sup> T cells in the spleen (Figure S1B,C).  
160 Concurrently, ATRi increased the percentage of un-activated TN CD8<sup>+</sup> T cells in the spleen. No  
161 significant changes in these populations were observed in the DLN (Figure S1B,C). While the CD8<sup>+</sup>  
162 TCM and TEM subpopulations in the TIL were not altered by ATRi (Figure S1B,D), the percentage  
163 of total CD62L<sup>lo</sup> CD8<sup>+</sup> T cells (which includes the effector/effector memory pool) decreased in TIL  
164 in mice treated with ATRi (Figure S1E,F).

165 To further define the population of effector CD8<sup>+</sup> T cells impacted by ATRi *in vivo*, we examined  
166 KLRG1, CD127, and CD69 expression on CD62L<sup>lo</sup> CD8<sup>+</sup> T cells. The percentage of short  
167 lived/terminal effector CD8<sup>+</sup> T cells (KLRG1<sup>+</sup> CD127<sup>-</sup>) decreased in TIL in mice treated with ATRi  
168 (Figure 2E,F). Similarly, the percentage of KLRG1<sup>+</sup> effector CD8<sup>+</sup> T cells that had been previously  
169 activated and had already downregulated CD69 (KLRG1<sup>+</sup> CD69<sup>-</sup>) decreased in TIL in mice treated  
170 with ATRi (Figure 2G,H). No significant changes in tissue resident (CD103<sup>+</sup> CD69<sup>+</sup>) or memory  
171 precursor effector (KLRG1<sup>-</sup> CD127<sup>+</sup>) or newly activated KLRG1<sup>+</sup> effector (KLRG1<sup>+</sup> CD69<sup>+</sup>) CD8<sup>+</sup> T  
172 cells were seen in TIL in mice treated with ATRi (Figure S1G-J).

173 Together these data show that ATRi decreases a short-lived population of effector CD8<sup>+</sup> T cells in  
174 TIL but does not impede CD8<sup>+</sup> T cell activation *in vivo*. This is entirely consistent with the data  
175 presented in Figure 1 that show that CD8<sup>+</sup> T cell activation is associated with significant increases  
176 in ATR and CHK1 protein expression and that ATR kinase activity is essential in activated,  
177 proliferating CD8<sup>+</sup> T cells that divide 4-5 times in 24 h *ex vivo*. Thus, the impact of ATRi on CD8<sup>+</sup> T  
178 cell activation and proliferation *ex vivo* is a physiologically relevant system in which to study  
179 mechanism.

### 180 **Most proliferating CD8<sup>+</sup> T cells are in S phase**

181 We reasoned that the sensitivity of proliferating CD8<sup>+</sup> T cells to ATRi-induced cell death relative  
182 to naïve CD8<sup>+</sup> T cells and other cell types (Figure 1C-E) may be associated with their rapid cell  
183 cycle. To determine the cell cycle distribution of proliferating CD8<sup>+</sup> T cells, and exponentially

184 dividing primary fibroblasts and B16, we labelled S phase cells with 5-ethynyl-2'-deoxyuridine  
185 (EdU) for 30 min and then identified EdU incorporation and DNA content using flow cytometry.  
186 Using these datasets, we estimated the length of G1, S, and G2/M (Figure S2A). In CD8<sup>+</sup> T cells,  
187 G1 was  $\sim 1.0 \pm 0.3$  h, S phase was  $\sim 4.7 \pm 0.3$  h, and G2/M was  $\sim 0.3 \pm 0.1$  h (Figure 3A). In fibroblasts,  
188 G1 was  $\sim 13 \pm 3.3$  h, S phase was  $\sim 8.2 \text{ h} \pm 1.8$  h, and G2/M was  $\sim 7.5 \pm 2.3$  h (26%) (Figure S2B). In B16,  
189 G1 was  $\sim 7.1 \pm 1.3$  h (41%), S phase was  $\sim 9.3 \pm 1.3$  h, and G2/M was  $0.7 \pm 0.3$  h (Figure S2C). The cell  
190 cycle distribution of these three different cell types is summarized in a figure wherein the  
191 circumference of the circle represents the doubling time (Figure 3B). It is striking that most  
192 proliferating CD8<sup>+</sup> T cells are in S phase.

### 193 **ATR kinase limits origin firing in CD8<sup>+</sup> T cells**

194 Next, we reasoned that ATRi-induced origin firing could cause DNA damage and death in rapidly  
195 proliferating CD8<sup>+</sup> T cells. In mammalian cells, CDK2 and CDC7 kinase-dependent mechanisms  
196 activate the replicative helicase and initiate DNA replication at  $\sim 10\%$  of licensed origins in a  
197 spatiotemporal pattern that is broadly conserved from one cell division to the next (Cayrou et al.,  
198 2011; Chagin et al., 2016). The 90% of licensed origins that are passively replicated, described as  
199 either dormant or flexible origins, are essential for genome stability (Ge et al., 2007). Origin firing  
200 between stalled forks is a simple way to recover replication that would otherwise be lost. In the  
201 vast majority of mammalian cells, the selective pressure for genome stability likely supersedes  
202 the need for rapid DNA replication and cell division. However, in effector CD8<sup>+</sup> T cells the selective  
203 pressure for rapid DNA replication and cell division may supersede the need for genome stability,  
204 as at least 90-95% are destined to undergo cell death during contraction. We used ATRi to  
205 investigate whether the fundamental mechanisms that mediate origin firing in mammalian cells  
206 are conserved in proliferating CD8<sup>+</sup> T cells.

207 To determine whether ATRi induces origin firing in proliferating CD8<sup>+</sup> T cells, we first examined  
208 the hyper-phosphorylation of chromatin bound MCM4 which has been associated with excessive  
209 activation of the replicative helicase (Sheu et al., 2016). ATRi, but not ATMi or PARPi, induced a  
210 mobility shift in MCM4 in chromatin extracts prepared from proliferating CD8<sup>+</sup> T cells (Figure 3C).  
211 WEE1i induced a mobility shift in MCM4 in chromatin extracts from proliferating CD8<sup>+</sup> T cells, but  
212 this was at the limits of detection. ATRi and WEE1i induce similar mobility shifts in MCM4 in

213 chromatin extracts prepared from U2OS and BJ-TERT (Moiseeva et al., 2019a). Since WEE1 is  
214 highly expressed in proliferating CD8<sup>+</sup> T cells (Figure 1B), the difference is not due to an absence  
215 of this kinase.

216 To determine whether ATRi induces changes in the replication timing program, we used Repli-  
217 seq. Proliferating CD8<sup>+</sup> T cells were treated with ATRi for 30 min and then added 5-bromo-2-  
218 deoxyuridine (BrdU) for an additional 30 min. CD8<sup>+</sup> T cells were sorted into 2N-3N and 3N-4N  
219 populations and BrdU-labelled nascent DNA was purified and sequenced. ATRi did not induce late  
220 origin firing in early S phase proliferating CD8<sup>+</sup> T cells (Figure 3D; Figure S3A,B). Furthermore, the  
221 distribution of DNA synthesis between early and late-S phase was not significantly different  
222 between fibroblasts and proliferating CD8<sup>+</sup> T cells (Figure S3C).

223 To determine whether ATRi increased DNA synthesis, we treated proliferating CD8<sup>+</sup> T cells with  
224 ATRi for 30 min and then added EdU for an additional 30 min, the same incubation intervals used  
225 for Repli-seq. EdU was quantitated in 2N-3N and 3N-4N cells using flow cytometry. ATRi increased  
226 the relative fluorophore-EdU intensity in proliferating CD8<sup>+</sup> T cells in both in early S phase and  
227 late S phase (Figure 3E). Thus, ATRi induces origin firing and increases DNA synthesis in  
228 proliferating CD8<sup>+</sup> T cells without impacting the replication timing pattern.

### 229 **ATR kinase limits CDK1-dependent origin firing across active replicons in CD8<sup>+</sup> T cells**

230 Since ATRi increased DNA synthesis in proliferating CD8<sup>+</sup> T cells by >25% without impacting the  
231 replication timing pattern, we reasoned that ATR kinase activity limits origin firing across active  
232 replicons in CD8<sup>+</sup> T cells. To test this, we combed DNA purified from proliferating CD8<sup>+</sup> T cells,  
233 exponentially dividing B16, and primary fibroblasts. Cells were treated with ATRi for 30 min  
234 followed by 5-iodo-2-deoxyuridine (IdU) for 10 min and 5-chloro-2-deoxyuridine (CldU) for 20  
235 min. ATRi decreased inter-origin distance in proliferating CD8<sup>+</sup> T cells, B16, and fibroblasts (Figure  
236 3F). ATRi also decreased replication track length in proliferating CD8<sup>+</sup> T cells, B16, and fibroblasts.  
237 Thus, ATRi induces dormant origin firing which increases the density and reduces the velocity of  
238 replication forks in proliferating CD8<sup>+</sup> T cells.

239 ATRi-induced dormant origin firing in U2OS and BJ-TERT is associated with a CDK1-dependent  
240 phosphorylation of RIF1 serine 2205 (serine-2153 in mouse) that disrupts an association between

241 RIF1 and PP1 (Moiseeva *et al.*, 2019b). RIF1 is a regulatory subunit of PP1 (Sukackaite *et al.*, 2017)  
242 and PP1 opposes CDC7 kinase activity at replication origins (Hiraga *et al.*, 2017). To determine  
243 whether these mechanisms are conserved in CD8<sup>+</sup> T cells, we treated proliferating CD8<sup>+</sup> T cells  
244 with titrations of CDK1i Ro-3306, CDK2i CVT-313, and CDC7i PHA-767491 for 15 min and then  
245 added ATRi for an additional 1 h. ATRi induced a mobility shift in MCM4 in chromatin extracts  
246 and this was blocked by 5  $\mu$ M Ro-3306 and 20  $\mu$ M PHA-76749, but not by CVT-313 (Figure 3G).

247 We generated a rabbit monoclonal antibody that identifies RIF1 only when it is phosphorylated  
248 on serine-2205 in human and serine-2153 in mouse (Figure S4). RIF1 phosphoserine-2153 was  
249 detected in proliferating CD8<sup>+</sup> T cells and this was increased by ATRi and blocked by 5  $\mu$ M Ro-  
250 3306 (Figure 3H). This is the first antibody that identifies mouse RIF1. The two isoforms identified  
251 here are consistent in size with those identified in mouse embryonic stem cells genetically  
252 engineered to express RIF1-FLAG-HA (Sukackaite *et al.*, 2017).

253 ATR kinase-dependent CHK1 activity phosphorylates CDC25A causing its degradation in the  
254 proteasome after DNA damage (Liu *et al.*, 2000; Mailand *et al.*, 2000; Sanchez *et al.*, 1997).  
255 CDC25A degradation induces cell cycle arrest because inhibitory phosphorylations on CDK2 and  
256 CDK1 cannot be removed (Hoffmann *et al.*, 1994). ATRi induces CDK1-dependent dormant origin  
257 firing and this suggests that physiological (low level) ATR-CHK1-CDC25A signaling limits origin  
258 firing by preventing CDK1 activation (Figure 3F/G). If this premise is correct, DNA damage-  
259 induced (high level) ATR-CHK1-CDC25A signaling should degrade CDC25A and this should reverse  
260 ATRi induced origin firing. Accordingly, the sequence of treatment with a DNA damaging agent  
261 and ATRi should determine whether ATRi induces hyper-phosphorylation of chromatin bound  
262 MCM4. We treated proliferating CD8<sup>+</sup> T cells and B16 with either ATRi or the ribonucleotide  
263 reductase (RNR) inhibitor hydroxyurea (HU) for 30 min and then added HU or ATRi, respectively,  
264 for an additional 30 min. When proliferating CD8<sup>+</sup> T cells and B16 were treated with HU before  
265 ATRi, ATRi did not induce a mobility shift in MCM4 in chromatin extracts (Figure 3I). In contrast,  
266 ATRi induced a mobility shift in MCM4 in chromatin extracts in proliferating CD8<sup>+</sup> T cells and B16.  
267 While this mobility shift was not reversed by subsequent treatment with HU, it was reduced,  
268 suggesting that free deoxyribonucleotides may be limiting for origin firing in cells treated with

269 ATRi and HU. Taken together, these data show that ATRi induces CDK1- and CDC7-kinase  
270 dependent origin firing across active replicons in proliferating CD8<sup>+</sup> T cells (Figure 3J).

### 271 **Exogenous nucleosides rescue ATRi-induced CD8<sup>+</sup> T cell death**

272 Exogenous nucleosides rescue genome instability associated with DNA replication in pluripotent  
273 stem cells and oncogene-induced senescence in primary fibroblasts cultured *in vitro* (Aird et al.,  
274 2013; Halliwell et al., 2020). We hypothesized that exogenous nucleosides may rescue ATRi-  
275 induced death in proliferating CD8<sup>+</sup> T cells. To test this hypothesis, we used three nucleoside  
276 cocktails reported to rescue genome instability: Low rN was 250 nM adenosine (A), cytidine (C),  
277 and guanosine (G), and thymidine (T)(Aird *et al.*, 2013); High rN was 15 μM A, C, and G, and 6 μM  
278 T; EmbryoMax, which is marketed for mouse embryonic stem cell culture applications, was 15  
279 μM A, C, G, and uridine (U), and 6 μM T (Halliwell *et al.*, 2020). We observed a dose-dependent  
280 rescue of ATRi-induced death in proliferating CD8<sup>+</sup> T cells when exogenous nucleosides were  
281 added to the tissue culture media 2 h prior to ATRi (Figure 4A). EmbryoMax did not rescue ATRi-  
282 induced CD8<sup>+</sup> T cell death as efficiently as high rN suggesting that 15 μM U had a negative impact  
283 on the survival of proliferating CD8<sup>+</sup> T cells treated with ATRi.

284 Thymidine concentrations of 1 mM or greater are used to inhibit DNA replication and arrest cells  
285 at the onset of S phase and this could protect proliferating CD8<sup>+</sup> T cells from ATRi-induced death  
286 (Bjursell and Reichard, 1973). We did not observe cell cycle arrest in proliferating CD8<sup>+</sup> T cells  
287 treated with the nucleoside cocktails used here where the maximum concentration of thymidine  
288 is 12 μM (Figure 4B; Figure S5).

289 ATRi is a competitive ATP inhibitor and the addition of exogenous nucleosides to the media could  
290 block the activity of the inhibitor by, for example, preventing its transport into proliferating CD8<sup>+</sup>  
291 T cells (Foote *et al.*, 2018). The addition of nucleosides to proliferating CD8<sup>+</sup> T cells two hours  
292 prior to ATRi did not block either the ATRi-induced mobility shift in MCM4 in the chromatin  
293 fraction or the inhibition of CHK1 phosphorylation indicating that ATRi AZD6738 still enters cells  
294 and is active in the presence of these concentrations of nucleosides (Figure 4C).

295 Inter-origin distance and replication fork velocity in CD8<sup>+</sup> T cells treated with ATRi were not  
296 changed by the addition of nucleosides (Figure 4D). Thus, exogenous nucleosides rescue ATRi-



297 induced death in proliferating CD8<sup>+</sup> T cells in a dose-dependent manner without impacting either  
298 the proliferation of cells, the activity of ATRi, or origin firing.

### 299 **ATR kinase prevents thymineless death in proliferating CD8<sup>+</sup> T cells**

300 To determine whether a single nucleoside could rescue ATRi-induced death in proliferating CD8<sup>+</sup>  
301 T cells, we treated with either 15 μM A, C, or G, or 6 μM T. Addition of 6 μM T rescued ATRi-  
302 induced death in proliferating CD8<sup>+</sup> T cells with similar efficiency to high rN while addition of  
303 other individual nucleosides did not significantly affect survival (Figure 5A). We did not observe  
304 cell cycle arrest in proliferating CD8<sup>+</sup> T cells treated with 6 μM T (Figure 5B; Figure S6A).

305 Hydroxyurea induces ATR kinase-dependent cell cycle arrest. To determine whether ATRi and HU  
306 induce death in proliferating CD8<sup>+</sup> T cells through a similar mechanism, we first determined the  
307 length of treatment with ATRi and HU needed to induce death in proliferating CD8<sup>+</sup> T cells. We  
308 treated proliferating CD8<sup>+</sup> T cells with thymidine and 2 h later added ATRi or 5 mM HU for 6 or 9  
309 h. Cells were then replated with or without thymidine and allowed to recover to 48 h post-  
310 activation.

311 ATRi for 6 h did not impact the proliferation of CD8<sup>+</sup> T cells while HU induced cell cycle arrest  
312 (Figure 5C). ATRi for 6 h induced death in proliferating CD8<sup>+</sup> T cells, but while thymidine increased  
313 the percentage of live cells, the change was not statistically significant (Figure S7). ATRi for 9 h  
314 induced death in proliferating CD8<sup>+</sup> T cells and this was rescued by 6 μM T (Figure 5D; Figure S8).  
315 In contrast, HU for 9 h induced death in proliferating CD8<sup>+</sup> T cells, and while HU-induced cell cycle  
316 arrest was rescued by 6 μM T, HU-induced CD8<sup>+</sup> T cell death was not rescued by 6 μM T. We  
317 conclude that the thymidine rescue of ATRi-induced death in proliferating CD8<sup>+</sup> T cells is  
318 associated with proliferation and not stalled replication forks.

319 Since ATRi-induced death in proliferating CD8<sup>+</sup> T cells is associated with proliferation, we  
320 hypothesized that thymidine was limiting for DNA polymerases. We therefore quantitated free  
321 deoxyribonucleotide concentrations in proliferating CD8<sup>+</sup> T cells treated with ATRi or HU for 1 h.  
322 Concentrations of dCTP, dCDP, dCMP, dTTP, dTDP, dTMP, and dUMP, and the concentration of  
323 dUTP decreased in proliferating CD8<sup>+</sup> T cells treated with HU (Figure 6A). HU induces ATR kinase-  
324 dependent cell cycle checkpoints and increases ATR kinase-dependent DCK activity for dNTP



325 salvage. Since dNTPs are not used in DNA synthesis and dNTP salvage pathways are induced in  
326 proliferating CD8<sup>+</sup> T cells treated with HU, concentrations of free dCTP, dTTP, dCDP, dTDP, dCMP,  
327 dTMP, and dUMP increase (Figure 6A). The concentration of dUTP decreased in proliferating CD8<sup>+</sup>  
328 T cells treated with HU. This suggests that DUT activity and thymidine salvage pathways were  
329 induced in response to a decreased dTTP:dUTP ratio. The concentration of dUTP also decreased  
330 in proliferating CD8<sup>+</sup> T cells treated with ATRi.

### 331 **ATR kinase prevents RRM2 and DCK degradation in the proteasome**

332 Deoxyuridine 5'-triphosphate nucleotidohydrolase (DUT) hydrolyses dUTP to dUMP and  
333 pyrophosphate, simultaneously reducing dUTP and providing dUMP for dTTP biosynthesis (Figure  
334 6B). A high cellular dTTP:dUTP ratio is essential to avoid dU contamination in genomic DNA. The  
335 decreased concentration of free dUTP in proliferating CD8<sup>+</sup> T cells treated with ATRi suggested  
336 that DUT activity had increased in response to a decreased dTTP:dUTP ratio. A key step in *de novo*  
337 dTMP biosynthesis is the reduction of UDP to dUDP by RNR. ATRi's were recently reported to  
338 induce CDK1-dependent phosphorylation and degradation of RRM2, a subunit of RNR, in Ewing  
339 sarcoma cells, acute lymphoblastic leukemia (ALL) cells, and adrenocortical carcinoma cells  
340 (Bothou et al., 2021; Koppenhafer et al., 2020; Le et al., 2017), consistent with the well-known  
341 CDK1-dependent degradation of RRM2 in G2 (D'Angiolella et al., 2012). Since ATRi and HU both  
342 decreased the concentration of dUTP, we hypothesized that ATRi may induce the CDK1-  
343 dependent degradation of RRM2 in proliferating CD8<sup>+</sup> T cells.

344 Furthermore, the increased concentration of dCDP (dUDP is at the limits of detection) in  
345 proliferating CD8<sup>+</sup> T cells treated for 1 h with HU, but not ATRi, suggested that ATR is required to  
346 mitigate the consequences of RNR inhibition. A key step in dNTP salvage is the phosphorylation  
347 of dA, dC, and dG by deoxycytidine kinase (DCK) to generate dAMP, dCMP, and dGMP. ATR  
348 phosphorylates DCK on serine-74 and this phosphorylation is associated with DCK kinase activity  
349 (Amsailale et al., 2012; Beyaert et al., 2016; Hazra et al., 2011). Since HU, but not ATRi increased  
350 the concentration of dCDP, we hypothesized that ATRi inhibited DCK in proliferating CD8<sup>+</sup> T cells.

351 To test these hypotheses, we immunoblotted RRM1, RRM2, DCK, and DUT, in proliferating CD8<sup>+</sup>  
352 T cells treated with ATRi for 1 or 4 h. HU increased RRM2 protein levels in proliferating CD8<sup>+</sup> T

353 cells at 4 h and this was ATR kinase-dependent (Figure 6C). ATRi decreased RRM2 and DCK protein  
354 levels in proliferating CD8<sup>+</sup> T cells at 1 h and 4 h. To determine whether the RRM2 and DCK were  
355 degraded in the proteasome following CDK-dependent phosphorylation, we treated proliferating  
356 CD8<sup>+</sup> T cells with the 5 μM MG132, a proteasome inhibitor, and 5 μM Ro-3306, for 15 min prior  
357 to ATRi for 2 h. ATRi-induced a CDK1-dependent reduction in RRM2 protein and this was largely  
358 via MG132-dependent degradation in the proteasome (Figure 6D). ATRi-induced a CDK1-  
359 dependent reduction in DCK protein and this was entirely via MG132-dependent degradation in  
360 the proteasome. The ATRi-induced reduction in RRM2 and DCK were blocked by 5 μM and 10 μM  
361 CDK1i Ro-3306 (Figure 6E). The ATRi-induced reduction in RRM2 and DCK was not blocked by 5  
362 μM CDK2i CVT-313 (Figure 6F).

363 To determine whether ATRi induced CDK1-dependent phosphorylation(s) on RRM2, we treated  
364 proliferating CD8<sup>+</sup> T cells with ATRi, with and without CDK1i, and immunoprecipitated proteins  
365 using a phospho-MAPK/CDK substrate (PXpSP or pSPXR/K) rabbit monoclonal antibody, and then  
366 immunoblotted RRM2 using a rabbit polyclonal antibody and a conformation-specific HRP-  
367 conjugated anti-rabbit antibody. Phosphospecific antibodies that identify RRM2  
368 phosphothreonine-33 (pTPPT mouse) and phosphoserine-20 (pSPLK mouse and human), known  
369 CDK-dependent sites, are not available. RRM2 was immunoprecipitated from proliferating CD8<sup>+</sup>  
370 T cells treated with ATRi (Figure 6G). Since the only sequence in RRM2 that matches the  
371 consensus of these antibodies is phosphoserine-20, we conclude that ATRi-induced the CDK1-  
372 dependent phosphorylation of pSPLK on RRM2.

373 To determine whether ATRi blocked the phosphorylation of DCK, we treated proliferating CD8<sup>+</sup> T  
374 cells with ATRi, with and without CDK1i for 1 h, and immunoprecipitated proteins using a  
375 phospho-SQ/phospho-TQ substrate rabbit monoclonal antibody, and immunoblotted DCK using  
376 a rabbit polyclonal antibody and a conformation-specific HRP-conjugated anti-rabbit antibody.  
377 Phosphospecific antibodies that identify DCK phosphoserine-74 (pSQ) are no longer available.  
378 DCK was immunoprecipitated from proliferating CD8<sup>+</sup> T cells and this was blocked by ATRi (Figure  
379 6H). Since the only sequence in DCK that matches the consensus of these antibodies is  
380 phosphoserine-74, we conclude that DCK is phosphorylated on this site by ATR in proliferating  
381 CD8<sup>+</sup> T cells.

## 382 **ATR kinase is essential for genome stability in proliferating CD8<sup>+</sup> T cells**

383 Since ATRi reduced RRM2 protein and DCK phosphorylation, and presumably their activity, in  
384 proliferating CD8<sup>+</sup> T cells, we hypothesized that ATRi may induce dU contamination in genomic  
385 DNA and genome instability. To quantitate DNA constituent base composition, we developed a  
386 fit-for-purpose LC-MS/MS assay that quantitated 1 rN per 20,000 bases from 1 mg DNA. We  
387 observed a significant increase in dU contamination, measured as the ratios of dU/dA and dU/T,  
388 in genomic DNA in proliferating CD8<sup>+</sup> T cells treated with ATRi for 1 h (Figure 7A). dU  
389 contamination in genomic DNA is repaired by base excision repair and mismatch repair, and this  
390 can generate DNA double-strand breaks at multiple damaged sites.

391 To determine whether ATRi induced DNA damage signaling in proliferating CD8<sup>+</sup> T cells, we  
392 quantitated  $\gamma$ H2AX in a flow cytometry assay. We observed a dramatic increase in the number of  
393  $\gamma$ H2AX positive proliferating CD8<sup>+</sup> T cells treated with ATRi for 2 and 4 h (Figure 7B). Since the  
394 number of  $\gamma$ H2AX positive proliferating CD8<sup>+</sup> T cells after treatment with ATRi for 2 and 4 h was  
395 decreased by approximately 50% by thymidine, we reasoned that a second class of lesion might  
396 also cause cell death.

397 We hypothesized that ATRi-induced dormant origin firing in genes may result in both R loops at  
398 sites of transcription and primer synthesis. To test this hypothesis, we generated genomic DNA  
399 from B16 and proliferating CD8<sup>+</sup> T cells treated with the topoisomerase inhibitor camptothecin  
400 (TOP1i) or ATRi for 1 h using conditions that preserve R loops and RNA primers (Chedin et al.,  
401 2021; Ginno et al., 2012). We immunopurified RNA-DNA hybrids from restriction endonuclease  
402 digested DNA using S9.6 and after extensive washing liberated the DNA from beads using  
403 proteinase K. Denatured DNA was dot blotted using an anti-single-stranded DNA antibody. RNA-  
404 DNA hybrids were induced by both TOP1i and ATRi (Figure 7C).

405 Origins preferentially fire in gene promoters rather than gene coding regions (Chen et al., 2019;  
406 Petryk et al., 2016). Transcription starts in early G1 phase, peaks at the G1/S boundary, and then  
407 fades during the early stages of S phase (Bertoli et al., 2013). These mechanisms that coordinate  
408 transcription and DNA replication may be critical in proliferating CD8<sup>+</sup> T cells that have a short G1  
409 phase (Figure 3A-B). We used the proximity ligation assay (PLA) to quantitate collisions between

410 DNA replication (identified by PCNA) and RNA transcription (identified by RNA polymerase II (Pol  
411 II) phosphoserine-5) complexes. We observed an increase in PCNA-RNA polymerase PLA signals  
412 in proliferating CD8<sup>+</sup> T cells treated with ATRi for 1 h (Figure 7D). This increase in PCNA-RNA  
413 polymerase-PCNA PLA signals was observed in both S phase cells (EdU<sup>+</sup>) and, to a lesser extent,  
414 EdU<sup>-</sup> cells. However, CD8<sup>+</sup> T cells divide extremely fast, and during a 1 h treatment with ATRi,  
415 ~20 % of cells are anticipated to exit S phase (~4.7±0.3 h/1 h).

## 416 **DISCUSSION**

417 ATRi's have advanced to phase 1 and phase 2 trials and NCI's Experimental Therapeutics Network  
418 has formed Project Teams to develop and prioritize ATRi's in clinical trials. In this study, we show  
419 that ATRi induces untimely CDK1 activity in S phase in proliferating CD8<sup>+</sup> T cells, and that this  
420 induces origin firing across active replicons and simultaneous degradation of dNTP synthesis and  
421 salvage enzymes. These effects of ATRi in proliferating CD8<sup>+</sup> T cells lead to dU contamination in  
422 genomic DNA, R loops, transcription-DNA replication machinery collisions, and death in  
423 proliferating CD8<sup>+</sup> T cells, but not in naïve CD8<sup>+</sup> T cells, B16 melanoma, or primary fibroblasts  
424 after a 24 h treatment. ATRi-induced death in proliferating CD8<sup>+</sup> T cells was significantly rescued  
425 by thymidine treatment. This may provide an explanation for how ATRi's suppress proliferating T  
426 cells causing dose-limiting toxicity in patients.

427 ATRi's are not inert agents that only have activity when combined with a DNA damaging agent.  
428 ATRi's fundamentally change DNA replication in cells and the effect is greater in proliferating  
429 CD8<sup>+</sup> T cells than naïve CD8<sup>+</sup> T and cancer cells. Thus, ATRi's may cause transient leukocytopenia  
430 without impacting naïve populations, allowing rebound proliferation of immune cell populations  
431 in both the tumor microenvironment (TME) and periphery. In the TME, many sub-populations of  
432 T cells in various degrees of dysfunction (exhausted T cells, regulatory T cells) are being  
433 continuously stimulated to proliferate. This *in situ* proliferative signal may represent an  
434 unappreciated target of ATRi's, such that certain populations are selectively targeted due to their  
435 underlying proliferation and replicative stress. Furthermore, recent preclinical studies  
436 demonstrate that ATRi's potentiates type I interferon (IFN1) signaling, production of pro-  
437 inflammatory cytokines/chemokines, myeloid immune cell infiltration, and antigen presentation  
438 after radiation (Dillon et al., 2019; Feng et al., 2020). Taken with our previous findings that ATRi

439 and radiation promote CD8<sup>+</sup> T cell-dependent anti-tumor responses (Vendetti *et al.*, 2018), these  
440 studies collectively link DNA damage following ATRi and radiation, pro-inflammatory cytokine  
441 signaling, recruitment and activation of the innate immune system, and activation of the adaptive  
442 immune system to mediate anti-tumor responses.

443 Our observation that ATR limits origin firing across active replicons in proliferating mouse CD8<sup>+</sup> T  
444 cells *ex vivo*, as well as in mouse and human cancer cell lines and fibroblasts, argues that the  
445 underlying mechanism is fundamental to DNA replication in these species. Consistent with this  
446 premise, we show that ATRi induces a CDK1 kinase-dependent phosphorylation on RIF1 serine-  
447 2153 (serine-2205 human) in proliferating CD8<sup>+</sup> T cells. We previously showed that RIF1 serine-  
448 2205 phosphorylation disrupts an association between PP1 and RIF1 in human U2OS and BJ-TERT  
449 (Moiseeva *et al.*, 2019b). Others showed that PP1 opposes CDC7 kinase-dependent origin firing  
450 in human cells (Hiraga *et al.*, 2017). Taken together, these data are consistent with a model in  
451 which ATR-CHK1-CDC25A signaling prevents the CDK1 kinase-dependent phosphorylation on  
452 RIF1 that would disrupt the localization of PP1 that opposes CDC7-dependent origin firing across  
453 active replicons. Accordingly, ATRi induces the CDK1 kinase-dependent phosphorylation on RIF1  
454 and this disrupts the localization of PP1, causing CDC7-dependent origin firing across active  
455 replicons (Figure 7F, right). In this model, ATR signaling limits origin firing in the absence of either  
456 DNA lesions or mechanical failures.

457 Our data showing that HU and ATRi have different effects in proliferating CD8<sup>+</sup> T cells are entirely  
458 consistent with the model suggested above. HU inhibits RNR activating a DDR that is anticipated  
459 to induce ATR-CHK1-CDC25A-dependent cell cycle checkpoints (Figure 5C) and increase ATR  
460 kinase-dependent DCK activity for dNTP salvage. Since dNTPs are not used in DNA synthesis and  
461 dNTP salvage pathways are induced in proliferating CD8<sup>+</sup> T cells treated with HU, concentrations  
462 of free dCTP, dTTP, dCDP, dTDP, dCMP, dTMP, and dUMP increase (Figure 6A). The decreased  
463 concentration of dUTP in proliferating CD8<sup>+</sup> T cells treated with HU (Figure 6A) suggests that DUT  
464 activity was increased in response to a decreased dTTP:dUTP ratio. While mechanisms that  
465 control DUT activity are not known, DUT hydrolyses dUTP to dUMP and pyrophosphate,  
466 simultaneously reducing dUTP to prevent dU contamination in genomic DNA and providing  
467 dUMP for the *de novo* synthesis of dTTP.

468 ATRi inhibits DCK (Figure 6H) and induces untimely CDK1 activity during S phase in proliferating  
469 CD8<sup>+</sup> T cells, and this increases DNA synthesis (Figure 3E) and causes RRM2 and DCK degradation  
470 in the proteasome (Figure 6C). Remarkably, these effects do not cause cell cycle arrest (Figure  
471 5C), or change dCTP, dTTP, dCDP, dTDP, dCMP, dTMP, and dUMP concentrations in proliferating  
472 CD8<sup>+</sup> T cells at 1 h (Figure 6A). The decreased concentration of dUTP in proliferating CD8<sup>+</sup> T cells  
473 treated with ATRi (Figure 6A) suggests that DUT activity had increased in response to a decreased  
474 dTTP:dUTP ratio. Our observation that the decrease in the concentration of dUTP in CD8<sup>+</sup> T cells  
475 treated with ATRi was less than those treated with HU, suggesting that ATR may be required to  
476 increase DUT activity in response to a decreased dTTP:dUTP ratio. The increased DNA synthesis,  
477 and modest decrease in the concentration of free dUTP, could explain why dU contamination in  
478 genomic DNA is observed in proliferating CD8<sup>+</sup> T cells treated with ATRi, but not HU (Figure 7A).  
479 dU contamination in genomic DNA is repaired by base excision repair (BER) mechanisms initiated  
480 by uracil DNA glycosylases, primarily UNG, and mismatch repair (MMR). The removal of uracil by  
481 UNG generates an abasic site which is cleaved by APE1 to generate a single-strand break (SSBs).  
482 ATRi's are anticipated to concentrate dU contamination in genomic DNA at replication forks, and  
483 the concentration of dU contamination may be further increased by futile cycles of BER repair  
484 synthesis when the dTTP:dUTP ratio is low. This could result in APE1-induced SSBs on opposite  
485 strands of the helix that generate DSBs at multiple damaged sites, and subsequently, cell death.  
486 This is entirely consistent with our observation of that ATRi induced  $\gamma$ H2AX in proliferating CD8<sup>+</sup>  
487 T cells at 2 and 4 h (Figure 7B). Since the number of  $\gamma$ H2AX positive proliferating CD8<sup>+</sup> T cells  
488 treated with ATRi decreased by approximately 50% by thymidine, we reasoned that a second  
489 class of lesion might also cause cell death.

490 In addition to our observation that ATRi induce dU contamination in genomic DNA, we also found  
491 that ATRi induce R loops and transcription-DNA replication machinery collisions in proliferating  
492 CD8<sup>+</sup> T cells. We anticipate that the extent to which ATRi will induce dU contamination in genomic  
493 DNA in cells is a function of the amount of ongoing DNA synthesis, determined by both the length  
494 of S phase and the rate of dTTP biosynthesis. We anticipate that the extent to which ATRi will  
495 induce R loops and DNA polymerase-RNA polymerase machinery collisions in cells is a function  
496 of the separation of RNA and DNA synthesis, determined by the relative length of S and G1 phase.

497 As G1 is abridged to approximately 1 h in proliferating CD8<sup>+</sup> T cells, most of the transcription must  
498 be concomitant with DNA replication. This is a fundamental difference between proliferating  
499 CD8<sup>+</sup> T cells, and cancer cells and fibroblasts. Pol II can synthesize 70 bp/sec and e.g. it would  
500 take Pol II approximately 44 min to transcribe just ATM (184,490 bp) without pausing (Darzacq  
501 et al., 2007). Accordingly, the number of active RNA polymerases and DNA polymerases in genes  
502 is likely to be greater in proliferating CD8<sup>+</sup> T cells than cancer cells or fibroblasts, and the number  
503 of ATRi-induced R loops and DNA polymerase-RNA polymerase machinery collisions is likely to  
504 be higher. Further work is needed to quantitate ATRi-induced DNA damage in different cell types.  
505 In summary, our work serves to highlight the direct impact of ATRi in CD8<sup>+</sup> T cells and points to a  
506 role for ATRi's as immune modulators. Our work also provides novel insights for the  
507 combinatorial application of ATRi with genotoxic therapies, including anti-metabolites, and  
508 immunotherapies in a clinical setting. Considering the wide interest in ATRi, CHK1i and WEE1i,  
509 which have a similar impact on origin firing in cancer cells, our insights may be used to design  
510 novel therapeutic approaches aimed at generating anti-tumor immunity.

## 511 **MATERIALS AND METHODS**

### 512 Antibodies

513 Antibodies used in this study are summarized in [Table SM1](#).

### 514 Inhibitors

515 AZD6738, AZD0156, Olaparib, and AZD1775 were provided by AstraZeneca. Other inhibitors used  
516 in this study are Ro-3306 (CDK1i, Selleckchem S7747), CVT-313 (CDK2i, Santa Cruz 199986-75-9),  
517 PHA-767491 (CDC7i, Selleckchem S2742), (S)-(+)-camptothecin (TOP1i, MilliporeSigma C9911),  
518 and MG132 (proteasome inhibitor, Selleckchem S2619).

### 519 Mice

520 C57BL/6, Pmel-1 TCR transgenic (B6.Cg-*Thy1<sup>o</sup>*/Cy Tg(TcraTcrb)8Rest/J), and female BALB/c mice  
521 were purchased from Jackson Laboratories.

### 522 Cell lines



523 B16-F10 (ATCC CRL-6475) and CT26 (ATCC CRL-2638) were cultured in DMEM and RPMI,  
524 respectively, containing 10 % FBS, 100 U/mL penicillin and 100 mg/mL streptomycin (all Lonza).  
525 Cells were routinely tested for mycoplasma.

#### 526 Primary fibroblasts isolation and culture

527 Primary fibroblasts were isolated from the ears of 6-8 week Pmel-1 mice as described previously  
528 (Khan and Gasser, 2016). Fibroblasts were cultured in DMEM containing 15 % FBS, 100 U/mL  
529 penicillin, 100 mg/mL streptomycin (all Lonza), 1x MEM NEAA, 1 mM sodium pyruvate, 25 mM  
530 HEPES pH 8.0, 120  $\mu$ M  $\beta$ -mercaptoethanol (all Gibco), and 250 ng/mL amphotericin-B (Sigma-  
531 Aldrich).

#### 532 CD8<sup>+</sup> T cell isolation, activation, and culture

533 CD8<sup>+</sup> T cells were extracted from spleen and lymph nodes of 6-8 week C57BL/6 and Pmel-1 mice.  
534 To obtain single cell suspension, spleens and lymph nodes were mechanically processed between  
535 frosted glass slides and filtered through 70  $\mu$ m cell strainers (Corning). Erythrocytes were lysed  
536 in 150 mM NH<sub>4</sub>Cl, 10 mM NaHCO<sub>3</sub>, 0.1 mM EDTA pH 8.0. Pmel-1 CD8<sup>+</sup> T cells were activated by  
537 incubating with R10 media (RPMI containing 10 % FBS, 100 U/mL penicillin and 100 mg/mL  
538 streptomycin (all Lonza), 1x MEM NEAA, 1 mM sodium pyruvate, 5 mM HEPES pH 8.0, 50  $\mu$ M  $\beta$ -  
539 mercaptoethanol (all Gibco)) supplemented with 1  $\mu$ M human gp100 (25-33) (Eurogentec) and  
540 50 U/mL IL-2 (PeproTech) for 24 h. Naïve CD8<sup>+</sup> T cells were cultured in R10 media containing 5  
541 ng/mL IL-7 (R&D systems). C57BL/6 CD8<sup>+</sup> T cells were purified using the EasySep Mouse CD8 T  
542 Cell Isolation Kit (Stemcell technologies) according to the manufacturer's instructions. C57BL/6  
543 CD8<sup>+</sup> T cells were activated by resuspending into R10 media containing 50 U/mL IL-2 (PeproTech)  
544 and 2  $\mu$ g/mL anti-CD28 antibody (BD) and then plated in a culture plate pre-coated with 10  $\mu$ g/mL  
545 anti-CD3 $\epsilon$  antibody (Biolegend). Culture medium was exchanged to R10 containing IL-2 and the  
546 cell density was adjusted to be 0.5 – 1x10<sup>6</sup> cells/ml every 24 h.

#### 547 Proliferation and survival assays

548 For the proliferation assay, 5x10<sup>6</sup> cells/mL were stained in 8 mg/mL Cell Trace Violet (CTV, Fisher)  
549 in PBS for 10 min. Staining was quenched the addition of with 5x the volume of R10 media and  
550 then activated as above. Cells were collected on ice and surface antigens were identified using



551 the antibodies indicated ([Table SM1](#)) for 15 min before staining for 10 min with eFluor780  
552 viability dye (1:4000, ThermoFisher). Cells were fixed in Fixation/Permeabilization reagent  
553 (eBioscience) and uncompensated data was collected using a LSRFortessa cytometer and  
554 FACSDiva Software (BD Biosciences). Compensation and analyses were performed using FlowJo  
555 v10 software. Gating is shown in [Figure SM1](#).

#### 556 Nuclease insoluble chromatin fractionation and immunoblotting

557 Purification of nuclease insoluble chromatin (NIC) and immunoblotting of hyper-  
558 phosphorylationMCM4 was performed as described previously (Moiseeva *et al.*, 2017). Soluble  
559 fractions were blotted for the antibodies listed in [Table SM1](#).

#### 560 In vivo treatments and immunophenotyping

561 CT26 cells (approximately  $5 \times 10^5$  in RPMI) were subcutaneously injected into the right hind flank  
562 of 8-10 week old mice. Treatment started 7-10 days later when tumors reached  $\sim 60$ - $120$  mm<sup>3</sup>.  
563 Mice were treated daily for 3 days with 75 mg/kg AZD6738 or vehicle in a volume of 10  $\mu$ L/g of  
564 bodyweight, as described previously (Vendetti *et al.*, 2018). AZD6738 was dosed (in 50 % H<sub>2</sub>O,  
565 40 % Propylene Glycol, 10 % DMSO) by oral gavage. Spleens, tumor-draining lymph nodes (DLN,  
566 right inguinal) and CT26 tumors were excised from mice at day 4. Tissues were processed to  
567 generate single cell suspensions, as described previously (Vendetti *et al.*, 2018). Briefly, spleens  
568 and DLN were mechanically dissociated between frosted glass slides and filtered through 70  $\mu$ m  
569 cell strainers (Corning). Tumors were injected in multiple locations with a total of 1.5 mL RPMI  
570 containing 50  $\mu$ g/mL Liberase DL research grade (Roche) and 10 U/mL DNase I (Sigma), incubated  
571 3 min at room temperature, cut into small pieces, incubated in a total volume of 5 mL Liberase  
572 DL/DNase solution for 15 min at 37°C, mechanically dissociated between frosted glass slides,  
573 filtered through 70  $\mu$ m cell strainers (Corning), vortexed at low speed for 90 sec, and filtered  
574 again through new 70  $\mu$ m cell strainers (Corning). Erythrocytes were lysed in 150 mM NH<sub>4</sub>Cl, 10  
575 mM NaHCO<sub>3</sub>, 0.1 mM EDTA pH 8.0. for 30 sec (spleens) or 10 sec (tumors). Cells suspensions  
576 were counted using a Scepter 2.0 or 3.0 handheld counter (Millipore) and seeded at  $1.5 \times 10^6$   
577 cells in 96-well round bottom plates for staining. Cells were blocked in FSC buffer (2% FBS/1x PBS)  
578 containing 0.5  $\mu$ g anti-CD16/32 antibody (TruStain FcX Plus, BioLegend) for 10 min at 4°C to block

579 non-specific binding of antibodies via Fc receptors, stained in FSC buffer containing antibodies to  
580 surface antigens, Brilliant Stain Buffer Plus (1:5, BD Biosciences), and True-Stain Monocyte  
581 Blocker (1:20, BioLegend) for 15 min at 4°C, stained with eFlour780 viability dye (1:4000,  
582 ThermoFisher) for 10 minutes at 4°C to label dead/dying cells, fixed and permeabilized in  
583 eBioscience Fixation/Permeabilization reagent (ThermoFisher) for 15 min at room temperature,  
584 and when performing nuclear staining of Ki67, stained for 45 min at room temperature in  
585 eBioscience 1x Permeabilization Buffer (ThermoFisher) containing anti-mouse Ki67 antibody.  
586 Uncompensated data were collected with a BD LSRFortessa 4-laser cytometer and BD FACSDiva  
587 software. Compensation and data analyses were performed in FlowJo V10 software. Single color  
588 compensation controls included single stained OneComp eBeads (ThermoFisher) and single  
589 stained spleen or DLN samples and matching unstained cells. Fluorescence minus one (FMO)  
590 controls were included where appropriate to empirically determine gating. Antibody panel for  
591 surface antigens are shown in [Table SM1](#) and gating strategies are shown in [Figures SM2/3](#).

#### 592 Cell cycle analysis

593 For cell cycle analysis, asynchronous populations of the cells were labeled with 10 µM EdU for 30  
594 minutes at 37 °C. Cells were harvested, washed with PBS, and fixed in cold 70 % ethanol on ice  
595 for 30 minutes. Fixed cells were permeabilized using 1x Saponin permeating solution (Alfa Aesar)  
596 diluted in 1% BSA in PBS for 15 min. EdU was identified using EdU Click-It kit (Thermofisher,  
597 C10632) according to the manufacturer's instructions. EdU-labeled cells were washed with 1x  
598 Saponin permeating solution and resuspended in 200 – 300 µl PBS containing 200 nM FxCycle™  
599 Far Red Stain (Thermofisher, F10348) and 0.1 mg/mL RNase A (Thermo Scientific, EN0531. Data  
600 were collected with a Accuri C6 cytometer and software (BD Biosciences). Data analyses were  
601 performed using Flowjo v10 software.

#### 602 Repli-seq

603 Library preparation was performed as described previously (Moiseeva et al., 2019a). Sequencing  
604 was performed on an Illumina HiSeq (GENEWIZ). Raw Repli-seq reads were trimmed and filtered  
605 for quality using Trim Galore  
606 ([https://www.bioinformatics.babraham.ac.uk/projects/trim\\_galore/](https://www.bioinformatics.babraham.ac.uk/projects/trim_galore/)). Reads were aligned using

607 bowtie2 (Langmead and Salzberg, 2012) against GRCm38 (mm10). Genome-wide RT profiles  
608 were constructed, scaled, and pooled for analysis, as described previously (Marchal et al., 2018).  
609 Briefly, Log<sub>2</sub> ratios of early versus late read counts were calculated for 50kb non-overlapping  
610 windows, Loess smoothed at 300kb windows. Data were visualized using IGV (Robinson et al.,  
611 2011). Repli-seq data have been deposited in the Gene Expression Omnibus database (accession  
612 no. GSE183412).

### 613 DNA combing

614 30 minutes post treatment, 25  $\mu$ M IdU was added for 10 minutes followed by 200  $\mu$ M CldU for  
615 20 minutes (both MP Biomedical). Cells were harvested and washed twice with PBS. Cells were  
616 then resuspended in PBS, mixed with an equal volume of 1 % low melting point agarose (Bio-Rad,  
617 161-3111), and allowed to solidify in plug molds (Bio-Rad, 170-3713). Agarose plugs were  
618 incubated in 2 mg/mL proteinase K, 50 mM EDTA, 1 % Sarkosyl, and 10 mM Tris pH 7.5 overnight  
619 at 50 °C. The buffer was replaced and the incubation was continued for an additional 6 h. Plugs  
620 were washed 5 times in TE50 (10 mM Tris-HCl pH 7.0, 50 mM EDTA) and stored at 4 °C or washed  
621 3 more times in TE (10 mM Tris-HCl pH 8.0, 1 mM EDTA). Each plug was melted in 200  $\mu$ l TE at  
622 68 °C for 30 minutes and then digested using  $\beta$ -agarase I (BioLabs, M0392L) at 42 °C overnight.  
623 MES buffer, pH 5.5 was gently added to increase the volume to 2 mL and the mixture was  
624 incubated at 68 °C 30 min. DNA was combed onto CombiCoverslips™ using the molecular  
625 combing system (Genomic Vision). Cover slips were baked for 2 h at 60 °C. DNA strands were  
626 denatured in 1 M NaOH and 1.5 M NaCl for 8 min, neutralized in PBS, and dehydrated with  
627 subsequent 5 minutes incubations with 70, 90, and 100 % ethanol. Halogenated nucleotides were  
628 identified with anti-IdU (1:20, BD Biosciences, 347580) and anti-CldU (1:50, Abcam, ab6326)  
629 antibodies for 1 h at 37 °C. Slides were then stained with anti-mouse Alexa 594 (1:50, Invitrogen,  
630 A11005) and anti-rat Alexa 488 (1:50, Invitrogen, A21470), followed by anti-ssDNA (1:50,  
631 Millipore, MAB3034), and then anti-mouse Alexa 647 (1:50, Invitrogen, A21235), each incubated  
632 for 30 min. Slides were dehydrated in ethanol as described above and mounted using ProLong™  
633 Diamond Antifade Mountant with DAPI (Invitrogen, P36971). DNA fiber images were acquired  
634 with a Nikon Ti inverted fluorescence microscope using NIS Elements v5.3 at 60x magnification  
635 and analyzed using Adobe Photoshop Elements 15 and ImageJ software.

## 636 Quantification of free nucleotides by LC-HRMS

637 Nucleotides were analyzed from cells by LC-HRMS as previously described (Kuskovsky et al., 2019).  
638 Cell pellets were extracted by addition of a 50  $\mu$ L (20 ng/ $\mu$ L) mix of all stable isotope labeled  
639 internal standards (1000 ng/sample) in 80:20 (v/v) methanol:water followed by 1 mL of  $-80^{\circ}\text{C}$   
640 80:20 (v/v) methanol:water before homogenization by probe tip sonication, incubation at  $-80^{\circ}\text{C}$   
641 for 30 min, centrifugation at 17,000 rcf for 10 minutes at  $4^{\circ}\text{C}$ , evaporation of the supernatant to  
642 dryness, then resuspended in 50  $\mu$ L 95:5 water: methanol. An Ultimate 3000 UHPLC equipped  
643 with an autosampler kept at  $6^{\circ}\text{C}$  and a column heater kept at  $55^{\circ}\text{C}$  using a HSS C18 column (2.1  
644  $\times$  100 mm i.d., 3.5  $\mu$ m; Waters) was used for separations. Solvent A was 5 mM DIPEA and 200  
645 mM HFIP and solvent B was methanol with 5 mM DIPEA 200 mM HFIP. The gradient was as  
646 follows: 100% A for 3 min at 0.18 mL/min, 100% A at 6 min with 0.2 mL/min, 98% A at 8 min with  
647 0.2 mL/min, 86% A at 12 min with 0.2 mL/min, 40% A at 16 min and 1% A at 17.9 min-18.5 min  
648 with 0.3 mL/min then increased to 0.4 mL/min until 20 min. Flow was ramped down to 0.18  
649 mL/min back to 100% A over a 5 min re-equilibration. For MS analysis, the UHPLC was coupled  
650 to a Q Exactive HF mass spectrometer (Thermo Scientific) equipped with a HESI II source  
651 operating in negative mode. The operating conditions were as follows: spray voltage 4000 V;  
652 vaporizer temperature  $200^{\circ}\text{C}$ ; capillary temperature  $350^{\circ}\text{C}$ ; S-lens 60; in-source CID 1.0 eV,  
653 resolution 60,000. The sheath gas (nitrogen) and auxiliary gas (nitrogen) pressures were 45 and  
654 10 (arbitrary units), respectively. Single ion monitoring (SIM) windows were acquired around the  
655 [M-H]<sup>-</sup> of each analyte with a 20 m/z isolation window, 4 m/z isolation window offset, 1e6 ACG  
656 target and 80 ms IT, alternating in a Full MS scan from 70-950 m/z with 1e6 ACG, and 100 ms IT.  
657 Data was analyzed in XCalibur v4.0 and/or Tracefinder v5.1 (Thermo Scientific) using a 5 ppm  
658 window for integration of the peak area of all analytes. Standards used as calibrants and isotope  
659 labeled internal standards are indicated in the [Table SM2](#), all were used without further  
660 purification, and no adequate commercially available diphosphate standard was found therefore  
661 the monophosphate was used as a surrogate standard.

## 662 Quantification of nucleosides incorporated into the genome

663 Cells were resuspended in TE buffer containing 62.5  $\mu$ g/mL proteinase K (Invitrogen, AM2546),  
664 62.5  $\mu$ g/mL RNase A (Thermo Scientific, EN0531), and 0.5 % SDS and incubated overnight at  $37^{\circ}\text{C}$ .

665 Genomic DNA was purified by phenol/chloroform extraction and resuspended in RNase/DNase  
666 free water. 5 µg DNA was digested with 5 µl RNase H (NEB, M0297), 3 µl Hind III (Fisher, FD0504),  
667 3 µl EcoRI (Fisher, FD0274), and 3 µl Bam HI (Fisher, FD0054) in RNase H buffer (NEB, M0297)  
668 overnight at 37 °C. Digested DNA was purified using the GeneJET PCR Purification Kit (Thermo  
669 Scientific, K0702). DNA was further digested into single nucleosides using DNA Degradase Plus  
670 (Zymo Research, E2021).

671 To quantitate DNA constituent base composition, a fit-for-purpose LC-MS/MS assay was  
672 implemented on a 1290 Infinity II Autosampler and Binary Pump and a SCIEX 6500+ triple  
673 quadrupole mass spectrometer. Chromatographic separation was conducted on an Inertsil ODS-  
674 3 (3 µm x 100 mm 2.1 mm) reverse phase column at ambient temperature with a gradient mobile  
675 phase of methanol and water with 0.1% formic acid. MRM transitions of all analytes and isotopic  
676 internal standards were monitored to construct calibration curves. We were able to quantitate  
677 1 rN per 20,000 bases from 1 mg DNA.

#### 678 R-loop purification and dot blot

679 Genomic DNA was prepared as above. 5 µg DNA was digested with 3 µl Hind III (Fisher, FD0504),  
680 3 µl EcoRI (Fisher, FD0274), and 3 µl Bam HI (Fisher, FD0054) +/- 5 µl RNase H (NEB, M0297) in  
681 RNase H buffer (NEB, M0297) overnight at 37 °C. Digested DNA was incubated with 50 µl of  
682 protein A/G agarose beads (Santa Cruz, sc-2003) and 10 ul mouse serum (MP Biomedicals,  
683 152282) in 1.5 mL PBS/0.5% Triton X100 for 2 h at 4 °C. Digested DNA was then incubated with  
684 50 µl of protein A/G agarose beads and 5 µl anti-S9.6 (Millipore, MABE1095) overnight at 4 °C.  
685 Agarose beads were washed 3x for 3 min in PBS/0.5% Triton X100 binding buffer followed by PBS  
686 wash for 3 min. The beads were then incubated with 3 µl proteinase K for 2 h at 37 °C. Nucleic  
687 acids were purified by phenol/chloroform extraction and ethanol precipitation. DNA was  
688 denatured in 50 µl TE and mixed with 50 µl of 0.8 M NaOH/20 mM EDTA solution for 10 min at  
689 95°C then placed on ice. The solution was neutralized using sodium acetate pH 7.0 and DNA  
690 sample was transferred to Whatman Hybond N+ Blotting Membrane (Millipore Sigma, Z761079).  
691 Nucleic acids were cross-linked by to the membrane by baking at 60 °C for 30 min followed by  
692 UV exposure. The membrane was blocked for 1 h with 5 % milk in TBST and blotted for anti-  
693 ssDNA (1:1000, Millipore, MAB3034).

694  $\gamma$ H2AX analyses

695 Cells were harvested, washed with PBS, and fixed in cold 70 % ethanol on ice for 30 minutes for  
696 immediate staining or stored at -20 °C until use. Fixed cells were washed with PBS and  
697 permeabilized using 1x Saponin permeating solution (Alfa Aesar) diluted in 1% BSA in PBS for 15  
698 min. Cells were stained with FITC anti-mouse  $\gamma$ H2AX (1:250 in FCS buffer) for 30 min.  $\gamma$ H2AX-  
699 labeled cells were washed with 1x Saponin permeating solution and resuspended in 200 – 300  $\mu$ l  
700 PBS containing 200 nM FxCycle™ Far Red Stain (Thermofisher, F10348) and 0.1 mg/mL RNase A  
701 (Thermo Scientific, EN0531). Data were collected with a Accuri C6 cytometer and software (BD  
702 Biosciences). Data analyses were performed using Flowjo v10 software.

703 Proximity ligation assay (PLA)

704 After treatment, cells were collected on glass slides using a cytospin (Thermo Scientific) at 2000  
705 rpm for 10 min. Cells were fixed with 4 % paraformaldehyde in PBS for 15 min and permeabilized  
706 in 0.1 % Triton X-100 for 10 min. Cells were washed with PBS, blocked with the blocking solution  
707 (Duolink) for 1 h and incubated overnight with anti-PCNA (1:5,000, ab 92552 (AbCam)) and anti-  
708 phospho-RNA polymerase II (S5) (1:100,000, ab5408 (AbCam)) in the Ab diluent solution  
709 (Duolink) at 4 °C. PLA reactions were performed using the following kits from Duolink: anti-rabbit  
710 PLUS (DUO92002), anti-mouse MUNUS (DUO92004), PLA detection reagent RED (DUO92008),  
711 and wash buffers, fluorescence (DUO8249). Slides were washed with PBS and EdU-labeled using  
712 EdU Click-It kit (Thermofisher, C10632). Cells were mounted using ProLong™ Diamond Antifade  
713 Mountant with DAPI (Invitrogen, P36971). Images were acquired with a Nikon Ti inverted  
714 fluorescence microscope using NIS Elements v5.3 at 60x magnification and analyzed using Adobe  
715 Photoshop Elements 15 and ImageJ software.

716 Study approval

717 Experimental procedures were approved by the University of Pittsburgh Animal Care and Use  
718 Committees and performed in accordance with the relevant guidelines and regulations.

719 **ACKNOWLEDGEMENTS**

720 We thank Mark O'Connor for providing AZD6738, AZD0156, AZD1775, and Olaparib.

721 This work was supported by R01CA236367 and R01CA204173 (CJB), R21CA259457 and  
722 DP2GM146320 (YG), R00 CA207871 (HUO), R37CA240625 (NWS and KMA), 1DP2OD024156  
723 (GMD) and R50CA211241 from the NIH, and PRG1477 from the Estonian Research Council (TNM).  
724 This project used the Animal Facility, Cancer Pharmacokinetics and Pharmacodynamics Facility,  
725 and the Cytometry Facility that are supported in part by award P30CA047904 from the NIH.

## 726 **AUTHOR CONTRIBUTIONS**

727 NS, FPV, AJC, JJD, SSH, DP, AB, YNG, and CJB designed, performed, and analyzed experiments.  
728 HUO, NWS, and JHB designed and analyzed experiments. TNM, YW, YNG, KMA, and GMD made  
729 significant academic contributions. NS, FPV, AJC, and CJB wrote the paper.

## 730 **CONFLICT OF INTEREST**

731 The authors declare no competing interests.

## 732 **REFERENCES**

- 733 Aird, K.M., Zhang, G., Li, H., Tu, Z., Bitler, B.G., Garipov, A., Wu, H., Wei, Z., Wagner, S.N., Herlyn,  
734 M., and Zhang, R. (2013). Suppression of nucleotide metabolism underlies the establishment  
735 and maintenance of oncogene-induced senescence. *Cell reports* *3*, 1252-1265.  
736 [10.1016/j.celrep.2013.03.004](https://doi.org/10.1016/j.celrep.2013.03.004).
- 737 Amsailale, R., Van Den Neste, E., Arts, A., Starczewska, E., Bontemps, F., and Smal, C. (2012).  
738 Phosphorylation of deoxycytidine kinase on Ser-74: impact on kinetic properties and nucleoside  
739 analog activation in cancer cells. *Biochem Pharmacol* *84*, 43-51. [10.1016/j.bcp.2012.03.022](https://doi.org/10.1016/j.bcp.2012.03.022).
- 740 Bertoli, C., Skotheim, J.M., and de Bruin, R.A. (2013). Control of cell cycle transcription during  
741 G1 and S phases. *Nat Rev Mol Cell Biol* *14*, 518-528. [10.1038/nrm3629](https://doi.org/10.1038/nrm3629).
- 742 Beyaert, M., Starczewska, E., Van Den Neste, E., and Bontemps, F. (2016). A crucial role for ATR  
743 in the regulation of deoxycytidine kinase activity. *Biochem Pharmacol* *100*, 40-50.  
744 [10.1016/j.bcp.2015.11.022](https://doi.org/10.1016/j.bcp.2015.11.022).
- 745 Bjursell, G., and Reichard, P. (1973). Effects of thymidine on deoxyribonucleoside triphosphate  
746 pools and deoxyribonucleic acid synthesis in Chinese hamster ovary cells. *J Biol Chem* *248*,  
747 3904-3909.
- 748 Bothou, C., Sharma, A., Oo, A., Kim, B., Perge, P., Igaz, P., Ronchi, C.L., Shapiro, I., and Hantel, C.  
749 (2021). Novel Insights into the Molecular Regulation of Ribonucleotide Reductase in  
750 Adrenocortical Carcinoma Treatment. *Cancers (Basel)* *13*. [10.3390/cancers13164200](https://doi.org/10.3390/cancers13164200).
- 751 Bracci, L., Schiavoni, G., Sistigu, A., and Belardelli, F. (2014). Immune-based mechanisms of  
752 cytotoxic chemotherapy: implications for the design of novel and rationale-based combined  
753 treatments against cancer. *Cell Death Differ* *21*, 15-25. [10.1038/cdd.2013.67](https://doi.org/10.1038/cdd.2013.67).
- 754 Brown, E.J., and Baltimore, D. (2000). ATR disruption leads to chromosomal fragmentation and  
755 early embryonic lethality. *Genes & development* *14*, 397-402.



756 Cayrou, C., Coulombe, P., Vigneron, A., Stanojcic, S., Ganier, O., Peiffer, I., Rivals, E., Puy, A.,  
757 Laurent-Chabalier, S., Desprat, R., and Mechali, M. (2011). Genome-scale analysis of metazoan  
758 replication origins reveals their organization in specific but flexible sites defined by conserved  
759 features. *Genome research* 21, 1438-1449. 10.1101/gr.121830.111.

760 Chagin, V.O., Casas-Delucchi, C.S., Reinhart, M., Schermelleh, L., Markaki, Y., Maiser, A., Bolius,  
761 J.J., Bensimon, A., Fillies, M., Domaing, P., et al. (2016). 4D Visualization of replication foci in  
762 mammalian cells corresponding to individual replicons. *Nat Commun* 7, 11231.  
763 10.1038/ncomms11231.

764 Chedin, F., Hartono, S.R., Sanz, L.A., and Vanoosthuysse, V. (2021). Best practices for the  
765 visualization, mapping, and manipulation of R-loops. *EMBO J* 40, e106394.  
766 10.15252/embj.2020106394.

767 Chen, Y.H., Keegan, S., Kahli, M., Tonzi, P., Fenyo, D., Huang, T.T., and Smith, D.J. (2019).  
768 Transcription shapes DNA replication initiation and termination in human cells. *Nat Struct Mol*  
769 *Biol* 26, 67-77. 10.1038/s41594-018-0171-0.

770 Ciccio, A., and Elledge, S.J. (2010). The DNA damage response: making it safe to play with  
771 knives. *Mol Cell* 40, 179-204. 10.1016/j.molcel.2010.09.019.

772 Cortez, D., Guntuku, S., Qin, J., and Elledge, S.J. (2001). ATR and ATRIP: partners in checkpoint  
773 signaling. *Science* 294, 1713-1716. 10.1126/science.1065521.

774 Couch, F.B., Bansbach, C.E., Driscoll, R., Luzwick, J.W., Glick, G.G., Betous, R., Carroll, C.M., Jung,  
775 S.Y., Qin, J., Cimprich, K.A., and Cortez, D. (2013). ATR phosphorylates SMARCAL1 to prevent  
776 replication fork collapse. *Genes & development* 27, 1610-1623. 10.1101/gad.214080.113.

777 D'Angiolella, V., Donato, V., Forrester, F.M., Jeong, Y.T., Pellacani, C., Kudo, Y., Saraf, A., Florens,  
778 L., Washburn, M.P., and Pagano, M. (2012). Cyclin F-mediated degradation of ribonucleotide  
779 reductase M2 controls genome integrity and DNA repair. *Cell* 149, 1023-1034.  
780 10.1016/j.cell.2012.03.043.

781 Darzacq, X., Shav-Tal, Y., de Turris, V., Brody, Y., Shenoy, S.M., Phair, R.D., and Singer, R.H.  
782 (2007). In vivo dynamics of RNA polymerase II transcription. *Nat Struct Mol Biol* 14, 796-806.  
783 10.1038/nsmb1280.

784 Dillon, M.T., Bergerhoff, K.F., Pedersen, M., Whittock, H., Crespo-Rodriguez, E., Patin, E.C.,  
785 Pearson, A., Smith, H.G., Paget, J.T.E., Patel, R.R., et al. (2019). ATR Inhibition Potentiates the  
786 Radiation-induced Inflammatory Tumor Microenvironment. *Clin Cancer Res* 25, 3392-3403.  
787 10.1158/1078-0432.CCR-18-1821.

788 Feng, X., Tubbs, A., Zhang, C., Tang, M., Sridharan, S., Wang, C., Jiang, D., Su, D., Zhang, H.,  
789 Chen, Z., et al. (2020). ATR inhibition potentiates ionizing radiation-induced interferon response  
790 via cytosolic nucleic acid-sensing pathways. *EMBO J* 39, e104036. 10.15252/embj.2019104036.

791 Ferraro, P., Franzolin, E., Pontarin, G., Reichard, P., and Bianchi, V. (2010). Quantitation of  
792 cellular deoxynucleoside triphosphates. *Nucleic Acids Res* 38, e85. 10.1093/nar/gkp1141.

793 Foote, K.M., Nissink, J.W.M., McGuire, T., Turner, P., Guichard, S., Yates, J.W.T., Lau, A., Blades,  
794 K., Heathcote, D., Odedra, R., et al. (2018). Discovery and Characterization of AZD6738, a Potent  
795 Inhibitor of Ataxia Telangiectasia Mutated and Rad3 Related (ATR) Kinase with Application as an  
796 Anticancer Agent. *J Med Chem* 61, 9889-9907. 10.1021/acs.jmedchem.8b01187.

797 Ge, X.Q., Jackson, D.A., and Blow, J.J. (2007). Dormant origins licensed by excess Mcm2-7 are  
798 required for human cells to survive replicative stress. *Genes & development* 21, 3331-3341.  
799 10.1101/gad.457807.



800 Ginno, P.A., Lott, P.L., Christensen, H.C., Korf, I., and Chedin, F. (2012). R-loop formation is a  
801 distinctive characteristic of unmethylated human CpG island promoters. *Mol Cell* *45*, 814-825.  
802 [10.1016/j.molcel.2012.01.017](https://doi.org/10.1016/j.molcel.2012.01.017).

803 Hall, A.B., Newsome, D., Wang, Y., Boucher, D.M., Eustace, B., Gu, Y., Hare, B., Johnson, M.A.,  
804 Milton, S., Murphy, C.E., et al. (2014). Potentiation of tumor responses to DNA damaging  
805 therapy by the selective ATR inhibitor VX-970. *Oncotarget* *5*, 5674-5685.  
806 [10.18632/oncotarget.2158](https://doi.org/10.18632/oncotarget.2158).

807 Halliwell, J.A., Frith, T.J.R., Laing, O., Price, C.J., Bower, O.J., Stavish, D., Gokhale, P.J., Hewitt, Z.,  
808 El-Khamisy, S.F., Barbaric, I., and Andrews, P.W. (2020). Nucleosides Rescue Replication-  
809 Mediated Genome Instability of Human Pluripotent Stem Cells. *Stem Cell Reports* *14*, 1009-  
810 1017. [10.1016/j.stemcr.2020.04.004](https://doi.org/10.1016/j.stemcr.2020.04.004).

811 Hazra, S., Szewczak, A., Ort, S., Konrad, M., and Lavie, A. (2011). Post-translational  
812 phosphorylation of serine 74 of human deoxycytidine kinase favors the enzyme adopting the  
813 open conformation making it competent for nucleoside binding and release. *Biochemistry* *50*,  
814 2870-2880. [10.1021/bi2001032](https://doi.org/10.1021/bi2001032).

815 Hiraga, S.I., Ly, T., Garzon, J., Horejsi, Z., Ohkubo, Y.N., Endo, A., Obuse, C., Boulton, S.J.,  
816 Lamond, A.I., and Donaldson, A.D. (2017). Human RIF1 and protein phosphatase 1 stimulate  
817 DNA replication origin licensing but suppress origin activation. *EMBO reports* *18*, 403-419.  
818 [10.15252/embr.201641983](https://doi.org/10.15252/embr.201641983).

819 Hoffmann, I., Draetta, G., and Karsenti, E. (1994). Activation of the phosphatase activity of  
820 human cdc25A by a cdk2-cyclin E dependent phosphorylation at the G1/S transition. *EMBO J*  
821 *13*, 4302-4310.

822 Hustedt, N., Alvarez-Quilon, A., McEwan, A., Yuan, J.Y., Cho, T., Koob, L., Hart, T., and Durocher,  
823 D. (2019). A consensus set of genetic vulnerabilities to ATR inhibition. *Open Biol* *9*, 190156.  
824 [10.1098/rsob.190156](https://doi.org/10.1098/rsob.190156).

825 Khan, M., and Gasser, S. (2016). Generating Primary Fibroblast Cultures from Mouse Ear and  
826 Tail Tissues. *J Vis Exp*. [10.3791/53565](https://doi.org/10.3791/53565).

827 Koppenhafer, S.L., Goss, K.L., Terry, W.W., and Gordon, D.J. (2020). Inhibition of the ATR-CHK1  
828 Pathway in Ewing Sarcoma Cells Causes DNA Damage and Apoptosis via the CDK2-Mediated  
829 Degradation of RRM2. *Mol Cancer Res* *18*, 91-104. [10.1158/1541-7786.MCR-19-0585](https://doi.org/10.1158/1541-7786.MCR-19-0585).

830 Krebs, M.G., Lopez, J., El-Khoueiry, A.B., Bang, Y.-J., Postel-Vinay, S., Abida, W., Carter, L., Xu,  
831 W., Im, S.-A., Pierce, A., et al. (2018). Abstract CT026: Phase I study of AZD6738, an inhibitor of  
832 ataxia telangiectasia Rad3-related (ATR), in combination with olaparib or durvalumab in  
833 patients (pts) with advanced solid cancers. *Cancer research* *78* (*Supplement*).  
834 <https://doi.org/10.1158/1538-7445.AM2018-CT026>.

835 Kuskovsky, R., Buj, R., Xu, P., Hofbauer, S., Doan, M.T., Jiang, H., Bostwick, A., Mesaros, C., Aird,  
836 K.M., and Snyder, N.W. (2019). Simultaneous isotope dilution quantification and metabolic  
837 tracing of deoxyribonucleotides by liquid chromatography high resolution mass spectrometry.  
838 *Anal Biochem* *568*, 65-72. [10.1016/j.ab.2018.12.023](https://doi.org/10.1016/j.ab.2018.12.023).

839 Kwok, M., Davies, N., Agathangelou, A., Smith, E., Oldreive, C., Petermann, E., Stewart, G.,  
840 Brown, J., Lau, A., Pratt, G., et al. (2016). ATR inhibition induces synthetic lethality and  
841 overcomes chemoresistance in TP53- or ATM-defective chronic lymphocytic leukemia cells.  
842 *Blood* *127*, 582-595. [10.1182/blood-2015-05-644872](https://doi.org/10.1182/blood-2015-05-644872).

843 Langmead, B., and Salzberg, S.L. (2012). Fast gapped-read alignment with Bowtie 2. *Nat*  
844 *Methods* 9, 357-359. 10.1038/nmeth.1923.

845 Le, T.M., Poddar, S., Capri, J.R., Abt, E.R., Kim, W., Wei, L., Uong, N.T., Cheng, C.M., Braas, D.,  
846 Nikanjam, M., et al. (2017). ATR inhibition facilitates targeting of leukemia dependence on  
847 convergent nucleotide biosynthetic pathways. *Nat Commun* 8, 241. 10.1038/s41467-017-  
848 00221-3.

849 Liu, Q., Guntuku, S., Cui, X.S., Matsuoka, S., Cortez, D., Tamai, K., Luo, G., Carattini-Rivera, S.,  
850 DeMayo, F., Bradley, A., et al. (2000). Chk1 is an essential kinase that is regulated by Atr and  
851 required for the G(2)/M DNA damage checkpoint. *Genes & development* 14, 1448-1459.

852 Lob, D., Lengert, N., Chagin, V.O., Reinhart, M., Casas-Delucchi, C.S., Cardoso, M.C., and Drossel,  
853 B. (2016). 3D replicon distributions arise from stochastic initiation and domino-like DNA  
854 replication progression. *Nat Commun* 7, 11207. 10.1038/ncomms11207.

855 Mahbubani, H.M., Chong, J.P., Chevalier, S., Thommes, P., and Blow, J.J. (1997). Cell cycle  
856 regulation of the replication licensing system: involvement of a Cdk-dependent inhibitor. *J Cell*  
857 *Biol* 136, 125-135.

858 Mailand, N., Falck, J., Lukas, C., Syljuasen, R.G., Welcker, M., Bartek, J., and Lukas, J. (2000).  
859 Rapid destruction of human Cdc25A in response to DNA damage. *Science* 288, 1425-1429.  
860 10.1126/science.288.5470.1425.

861 Marchal, C., Sasaki, T., Vera, D., Wilson, K., Sima, J., Rivera-Mulia, J.C., Trevilla-Garcia, C.,  
862 Nogues, C., Nafie, E., and Gilbert, D.M. (2018). Genome-wide analysis of replication timing by  
863 next-generation sequencing with E/L Repli-seq. *Nat Protoc* 13, 819-839.  
864 10.1038/nprot.2017.148.

865 Mohni, K.N., Thompson, P.S., Luzwick, J.W., Glick, G.G., Pendleton, C.S., Lehmann, B.D.,  
866 Pietenpol, J.A., and Cortez, D. (2015). A Synthetic Lethal Screen Identifies DNA Repair Pathways  
867 that Sensitize Cancer Cells to Combined ATR Inhibition and Cisplatin Treatments. *PLoS One* 10,  
868 e0125482. 10.1371/journal.pone.0125482.

869 Moiseeva, T., Hood, B., Schamus, S., O'Connor, M.J., Conrads, T.P., and Bakkenist, C.J. (2017).  
870 ATR kinase inhibition induces unscheduled origin firing through a Cdc7-dependent association  
871 between GINS and And-1. *Nat Commun* 8, 1392. 10.1038/s41467-017-01401-x.

872 Moiseeva, T.N., Qian, C., Sugitani, N., Osmanbeyoglu, H.U., and Bakkenist, C.J. (2019a). WEE1  
873 kinase inhibitor AZD1775 induces CDK1 kinase-dependent origin firing in unperturbed G1- and  
874 S-phase cells. *Proc Natl Acad Sci U S A* 116, 23891-23893. 10.1073/pnas.1915108116.

875 Moiseeva, T.N., Yin, Y., Calderon, M.J., Qian, C., Schamus-Haynes, S., Sugitani, N.,  
876 Osmanbeyoglu, H.U., Rothenberg, E., Watkins, S.C., and Bakkenist, C.J. (2019b). An ATR and  
877 CHK1 kinase signaling mechanism that limits origin firing during unperturbed DNA replication.  
878 *Proc Natl Acad Sci U S A* 116, 13374-13383. 10.1073/pnas.1903418116.

879 O'Connor, M.J. (2015). Targeting the DNA Damage Response in Cancer. *Mol Cell* 60, 547-560.  
880 10.1016/j.molcel.2015.10.040.

881 Petryk, N., Kahli, M., d'Aubenton-Carafa, Y., Jaszczyszyn, Y., Shen, Y., Silvain, M., Thermes, C.,  
882 Chen, C.L., and Hyrien, O. (2016). Replication landscape of the human genome. *Nat Commun* 7,  
883 10208. 10.1038/ncomms10208.

884 Robinson, J.T., Thorvaldsdottir, H., Winckler, W., Guttman, M., Lander, E.S., Getz, G., and  
885 Mesirov, J.P. (2011). Integrative genomics viewer. *Nat Biotechnol* 29, 24-26. 10.1038/nbt.1754.

886 Roulston, A., Zimmermann, M., Papp, R., Skeldon, A., Pellerin, C., Dumas-Berube, E., Dumais, V.,  
887 Dorich, S., Fader, L.D., Fournier, S., et al. (2021). RP-3500: A Novel, Potent and Selective ATR  
888 Inhibitor that is Effective in Preclinical Models as a Monotherapy and in Combination with PARP  
889 Inhibitors. *Mol Cancer Ther.* 10.1158/1535-7163.MCT-21-0615.  
890 Sanchez, Y., Wong, C., Thoma, R.S., Richman, R., Wu, Z., Piwnica-Worms, H., and Elledge, S.J.  
891 (1997). Conservation of the Chk1 checkpoint pathway in mammals: linkage of DNA damage to  
892 Cdk regulation through Cdc25. *Science* 277, 1497-1501. 10.1126/science.277.5331.1497.  
893 Sato, H., Niimi, A., Yasuhara, T., Permata, T.B.M., Hagiwara, Y., Isono, M., Nuryadi, E., Sekine, R.,  
894 Oike, T., Kakoti, S., et al. (2017). DNA double-strand break repair pathway regulates PD-L1  
895 expression in cancer cells. *Nat Commun* 8, 1751. 10.1038/s41467-017-01883-9.  
896 Sheu, Y.J., Kinney, J.B., and Stillman, B. (2016). Concerted activities of Mcm4, Sld3, and Dbf4 in  
897 control of origin activation and DNA replication fork progression. *Genome research* 26, 315-  
898 330. 10.1101/gr.195248.115.  
899 Sorensen, C.S., Syljuasen, R.G., Lukas, J., and Bartek, J. (2004). ATR, Claspin and the Rad9-Rad1-  
900 Hus1 complex regulate Chk1 and Cdc25A in the absence of DNA damage. *Cell Cycle* 3, 941-945.  
901 Sukackaite, R., Cornacchia, D., Jensen, M.R., Mas, P.J., Blackledge, M., Enverald, E., Duan, G.,  
902 Auchynnikava, T., Kohn, M., Hart, D.J., and Buonomo, S.B.C. (2017). Mouse Rif1 is a regulatory  
903 subunit of protein phosphatase 1 (PP1). *Sci Rep* 7, 2119. 10.1038/s41598-017-01910-1.  
904 Tan, J.T., Dudl, E., LeRoy, E., Murray, R., Sprent, J., Weinberg, K.I., and Surh, C.D. (2001). IL-7 is  
905 critical for homeostatic proliferation and survival of naive T cells. *Proc Natl Acad Sci U S A* 98,  
906 8732-8737. 10.1073/pnas.161126098.  
907 Vendetti, F.P., Karukonda, P., Clump, D.A., Teo, T., Lalonde, R., Nugent, K., Ballew, M., Kiesel,  
908 B.F., Beumer, J.H., Sarkar, S.N., et al. (2018). ATR kinase inhibitor AZD6738 potentiates CD8+ T  
909 cell-dependent antitumor activity following radiation. *J Clin Invest* 128, 3926-3940.  
910 10.1172/JCI96519.  
911 Vendetti, F.P., Lau, A., Schamus, S., Conrads, T.P., O'Connor, M.J., and Bakkenist, C.J. (2015).  
912 The orally active and bioavailable ATR kinase inhibitor AZD6738 potentiates the anti-tumor  
913 effects of cisplatin to resolve ATM-deficient non-small cell lung cancer in vivo. *Oncotarget* 6,  
914 44289-44305. 10.18632/oncotarget.6247.  
915 Wang, C., Wang, G., Feng, X., Shepherd, P., Zhang, J., Tang, M., Chen, Z., Srivastava, M.,  
916 McLaughlin, M.E., Navone, N.M., et al. (2019). Genome-wide CRISPR screens reveal synthetic  
917 lethality of RNASEH2 deficiency and ATR inhibition. *Oncogene* 38, 2451-2463. 10.1038/s41388-  
918 018-0606-4.  
919 Wengner, A.M., Siemeister, G., Lucking, U., Lefranc, J., Wortmann, L., Lienau, P., Bader, B.,  
920 Bomer, U., Moosmayer, D., Eberspacher, U., et al. (2020). The Novel ATR Inhibitor BAY 1895344  
921 Is Efficacious as Monotherapy and Combined with DNA Damage-Inducing or Repair-  
922 Compromising Therapies in Preclinical Cancer Models. *Mol Cancer Ther* 19, 26-38.  
923 10.1158/1535-7163.MCT-19-0019.  
924 Yoon, H., Kim, T.S., and Braciale, T.J. (2010). The cell cycle time of CD8+ T cells responding in  
925 vivo is controlled by the type of antigenic stimulus. *PLoS One* 5, e15423.  
926 10.1371/journal.pone.0015423.  
927 Zou, L., and Elledge, S.J. (2003). Sensing DNA damage through ATRIP recognition of RPA-ssDNA  
928 complexes. *Science* 300, 1542-1548. 10.1126/science.1083430.  
929

931 **Figures**

932 **Figure 1: ATRi selectively induces death in proliferating CD8<sup>+</sup> T cells *ex vivo*.**

933 **A.** Proliferation of Pmel-1 CD8<sup>+</sup> T cells activated with gp100 *ex vivo*. CTV histograms of live, CD44<sup>hi</sup>  
934 CD8<sup>+</sup> T cells at indicated time post-activation are shown. The number of cell divisions is shown.  
935 Red histograms are unactivated CD8<sup>+</sup> T cells. **B.** Immunoblots of CD8<sup>+</sup> T whole cell extracts  
936 prepared at 0 and 30 h post-activation. **C.** CD8<sup>+</sup> T cells were activated and treated with 5 μM  
937 AZD6738 (ATRi) from 0 - 24 h (blue) or 24 - 48 h (red). At 48 h, the percentage of live CD8<sup>+</sup> T cells  
938 (eFluor 780<sup>-</sup>CD8<sup>+</sup>TCRβ<sup>+</sup>) was quantitated. **D.** Naïve CD8<sup>+</sup> T cells were maintained in IL-7 *ex vivo*  
939 (unactivated) and treated with 5 μM ATRi from 0 - 24 h or 24 - 48 h. At 48 h, the percentage of  
940 live CD8<sup>+</sup> T cells was quantitated. **E.** Exponentially dividing B16 cells or primary fibroblasts were  
941 treated with ATRi for 24 h the percentage of live cells was quantitated. **F.** CD8<sup>+</sup> T cells were  
942 activated and treated with 5 μM ATRi, 500 nM ATMi (AZD0156), 5 μM PARPi (Olaparib), or 500  
943 nM WEE1i (AZD1775) from 24 - 48 h. At 48 h, the percentage of live CD8<sup>+</sup> T cells was quantitated.  
944 **C-F.** Mean and SD bars shown. \*:P < 0.05; \*\*: P < 0.01; \*\*\*: P < 0.001, \*\*\*\*: P < 0.0001 by ANOVA  
945 with Tukey's multiple comparisons.

946

947 **Figure 2: ATRi selectively induces death in proliferating CD8<sup>+</sup> T cells *in vivo*.**

948 **A-H.** Immunoprofiling of tissues harvested on day 4 from CT26 tumor-bearing mice treated with  
949 75 mg/kg AZD6738 (ATRi) or vehicle (Veh) on days 1-3. **A.** Quantitation of tumor-infiltrating (TIL)  
950 CD8<sup>+</sup> T cells (per mg of tumor) and quantitation of spleen and tumor-draining lymph node (DLN)  
951 CD8<sup>+</sup> T cells (as a percentage of total CD45<sup>+</sup> cells). **B.** Representative contour plots of Ki67<sup>+</sup>  
952 expression in CD8<sup>+</sup> T cells in the TIL, spleen, and DLN. **C.** Quantitation of proliferating (Ki67<sup>+</sup>) CD8<sup>+</sup>  
953 T cells in the TIL, spleen, and DLN. **D.** Quantitation of CD69<sup>+</sup> CD8<sup>+</sup> T cells in the TIL, spleen, and  
954 DLN. **E.** Representative contour plots of KLRG1 and CD127 expression on CD62L<sup>lo</sup> CD8<sup>+</sup> T cells in  
955 the TIL. **F.** Quantitation of KLRG1<sup>+</sup>CD127<sup>-</sup> CD62L<sup>lo</sup> CD8<sup>+</sup> T cells (as a percentage of total CD8<sup>+</sup> T  
956 cells) in the TIL. **G.** Representative contour plots of KLRG1 and CD69 expression on CD62L<sup>lo</sup> CD8<sup>+</sup>  
957 T cells in the TIL. **H.** Quantitation of KLRG1<sup>+</sup>CD69<sup>-</sup> CD62L<sup>lo</sup> CD8<sup>+</sup> T cells (as a percentage of total  
958 CD8<sup>+</sup> T cells) in the TIL. **A-D.** n = 7 mice total (6 DLN for ATRi) from 2 independent experiments,  
959 each with 3-4 mice per arm. **E-H.** n = 4 (Veh) or 5 (ATRi) mice from one experiment. **A, C-D, F-H.**

960 Mean and SD bars shown. \*: P < 0.05, \*\*: P < 0.01, \*\*\*: P < 0.001, \*\*\*\*: P < 0.0001 by two-tailed,  
961 unpaired t-test.

962

963 **Figure 3: ATR kinase limits origin firing across active replicons in proliferating CD8<sup>+</sup> T cells.**

964 **A.** EdU versus DNA histograms of proliferating CD8<sup>+</sup> T cells and exponentially dividing primary  
965 fibroblasts. The percentage of cells in each cell cycle phase and the doubling time was used to  
966 estimate the length of G1, S, and G2/M. **B.** Cartoon of the lengths of cell cycle and each phases  
967 of proliferating CD8<sup>+</sup> T cells, B16 cancer cells, and primary fibroblasts drawn to scale. **C.**  
968 Immunoblot of MCM4 in nuclease insoluble fraction in proliferating CD8<sup>+</sup> T cells treated with 5  
969 μM ATRi, 500 nM ATMi (AZD0156), 5 μM PARPi (AZD2281/Olaparib), or 500 nM Wee1i (AZD1775)  
970 for 1 h. **D.** Repli-seq analyses of the replication timing program of proliferating CD8<sup>+</sup> T cells  
971 treated with DMSO (blue) or 5 μM AZD6738 (red) for 1 h. Upper – whole genome. Lower -  
972 chromosome 1. Sequencing data are deposited at GEO (code: GSE183412). **E.** EdU incorporation  
973 in early (2-3N) and late (3-4N) S phase in proliferating CD8<sup>+</sup> T cells treated with DMSO or 5 μM  
974 ATRi for 1h. 10 μM EdU was added from 30-60 min. **F.** DNA fiber analyses of proliferating CD8<sup>+</sup> T  
975 cells, B16, and primary fibroblasts treated with DMSO or 5 μM ATRi for 1 h. Cells were treated  
976 with IdU from 30-40 min and CldU from 40-60 min of the treatment. **G.** Immunoblots of MCM4  
977 in nuclease insoluble fraction in proliferating CD8<sup>+</sup> T cells treated with increasing concentrations  
978 of Ro-3306 (CDK1i), CVT-313 (CDK2i), or PHA-767491 (CDC7i) for 75 min. Cells were treated with  
979 ATRi from 15-75 min. **H.** Immunoblot of RIF1 phosphoserine-2153 (S2205 in human) in whole cell  
980 extracts of proliferating CD8<sup>+</sup> T cells treated with increasing concentrations of Ro-3306 for 75 min.  
981 Cells were treated with ATRi from 15-75 min. **I.** Immunoblot of MCM4 in the nuclease insoluble  
982 fraction of proliferating CD8<sup>+</sup> T cells or B16 treated with 5 μM ATRi and/or 5 mM HU in the  
983 sequence indicated. **J.** Model showing that ATR limits origin firing across active replicons. Green  
984 circles indicate origins that fired and red circles indicate origins that have not fired. **E-F.** Mean  
985 and SD bars shown. \*: P < 0.05, \*\*: P < 0.01, \*\*\*: P < 0.001, \*\*\*\*: P < 0.0001 by two-tailed,  
986 unpaired t-test.

987 **Figure 4: Nucleosides rescue proliferating CD8<sup>+</sup> T cells from ATRi-induced cell death.**



988 **A.** Proliferating CD8<sup>+</sup> T cells were treated with nucleoside cocktails at 22 h and ATRi at 24 h . For  
989 x2, proliferating CD8<sup>+</sup> T cells were treated with nucleoside cocktails at 22 h and 30 h. At 48 h, the  
990 percentage of live CD8<sup>+</sup> T cells (eFluor 780-CD8<sup>+</sup>TCRβ<sup>+</sup>) was quantitated. Low rN is 250 nM A, C,  
991 G, and T. High rN is 15 μM A, C, G, and 6 μM T. EmbryoMax is 15 μM A, C, G, U, and 6 μM T. **B.**  
992 CTV histograms of live (eFluor 780-CD44<sup>hi</sup>CD8<sup>+</sup>) cells at 24 h (grey) or 48 h (blue) treated with  
993 nucleosides and ATRi as described in panel A. Number of cell divisions is indicated. **C.** Immunoblot  
994 of MCM4 in nuclease insoluble fraction in proliferating CD8<sup>+</sup> T cells treated low rN or high rN for  
995 2 h prior to 5 μM ATRi for 1 h. Immunoblots of CHK1, CHK1 phosphoserine-345, and GAPDH are  
996 from the soluble fraction. **D.** DNA combing analyses of proliferating CD8<sup>+</sup> T cells treated with high  
997 rN for 2 h prior to 5 μM ATRi for 1 h. Cells were treated with IdU for from 30-40 min and CldU  
998 from 40-60 min during the treatment with ATRi. **A and D (right panel).** Mean and SD bars shown.  
999 \*: P < 0.05, \*\*: P < 0.01, \*\*\*: P < 0.001, \*\*\*\*: P < 0.0001 by one-way ANOVA with Tukey's multiple  
1000 comparisons. **D (left panel).** \*: P < 0.05, \*\*: P < 0.01, \*\*\*: P < 0.001, \*\*\*\*: P < 0.0001 by two-  
1001 tailed, unpaired t-test.

1002

1003 **Figure 5: Thymidine rescues proliferating CD8<sup>+</sup> T cells from ATRi-induced cell death.**

1004 **A.** Proliferating CD8<sup>+</sup> T cells were treated with either 15 μM A, C, G, or 6 μM T, or high rN at 22 h  
1005 and ATRi at 24 h. At 48 h, the percentage of live CD8<sup>+</sup> T cells (eFluor 780-CD8<sup>+</sup>TCRβ<sup>+</sup>) was  
1006 quantitated. **B.** CTV histograms of live (eFluor 780-CD44<sup>hi</sup>CD8<sup>+</sup>) cells at 24 h (grey) or 48 h (color)  
1007 treated with nucleoside(s) and ATRi as described in panel A. Number of cell divisions is indicated.  
1008 **C.** Proliferating CD8<sup>+</sup> T cells were treated with 6 μM T at 22 h and either ATRi or HU at 24 h. At  
1009 30 h, cells were replated with and without 6 μM T. CTV histograms of live (eFluor 780-CD44<sup>hi</sup>CD8<sup>+</sup>)  
1010 cells at 24 h (grey), and 30 h and 48 h (with recovery) for ATRi- and HU-treated (6 h) samples  
1011 (DMSO treated histograms in black; thymidine treated histograms in pink). Number of cell  
1012 divisions is indicated. **D.** Proliferating CD8<sup>+</sup> T cells were activated and treated with 6 μM T at 22  
1013 h and either ATRi or HU at 24 h. At 33 h, cells were replated with and without 6 μM T. At 48 h,  
1014 the percentage of live CD8<sup>+</sup> T cells (eFluor 780-CD8<sup>+</sup>TCRβ<sup>+</sup>) was quantitated. **A and D.** Mean and  
1015 SD bars shown. \*: P < 0.05, \*\*: P < 0.01, \*\*\*: P < 0.001, \*\*\*\*: P < 0.0001 by one-way ANOVA with  
1016 Tukey's multiple comparisons.

1017

1018 **Figure 6: ATRi induces degradation of RRM2 and DCK in proliferating CD8<sup>+</sup> T cells.**

1019 **A.** Quantitation of cellular deoxyribonucleosides in proliferating CD8<sup>+</sup> T cells treated with DMSO,  
1020 5  $\mu$ M ATRi, or 5 mM HU. **B.** Cartoon of nucleoside metabolism. **C-F.** Immunoblots of proliferating  
1021 CD8<sup>+</sup> T whole cell extracts. **C.** Proliferating CD8<sup>+</sup> T cells were treated with 5  $\mu$ M ATRi and 5 mM  
1022 HU for 1 or 4 h. **D.** Proliferating CD8<sup>+</sup> T cells were treated with 5  $\mu$ M MG132 (protease inhibitor)  
1023 and 5  $\mu$ M Ro-3306 (CDK1i) for 15 min prior to ATRi for 2 h. **E.** Proliferating CD8<sup>+</sup> T cells were  
1024 treated with increasing concentrations of Ro-3306 (CDK1i) for 15 min followed by 5  $\mu$ M ATRi for  
1025 1 h. **F.** Proliferating CD8<sup>+</sup> T cells were treated with increasing concentrations of CVT-313 (CDK2i)  
1026 for 15 min followed by 5  $\mu$ M ATRi for 1 h. **G-H.** Whole cell extracts were generated from  
1027 proliferating CD8<sup>+</sup> T cells treated with 5  $\mu$ M ATRi and 5  $\mu$ M CDK1i for 1 h. **G.** Proteins  
1028 immunopurified with anti-pSPXK antibodies (phospho-MAPK/CDK substrates) were  
1029 immunoblotted for RRM2. **H.** Proteins immunopurified with an anti-pSQ antibody (phospho-  
1030 ATM/ATR substrates) were immunoblotted for DCK. **A.** Mean and SD bars shown. \*: P < 0.05, \*\*:  
1031 P < 0.01, \*\*\*: P < 0.001, \*\*\*\*: P < 0.0001 by one-way ANOVA with Dunnett multiple comparisons.

1032

1033 **Figure 7: ATRi-induces genome instability in proliferating CD8<sup>+</sup> T cells.**

1034 **A.** Quantitation of dU contamination in genomic DNA prepared from proliferating CD8<sup>+</sup> T cells  
1035 treated with 5  $\mu$ M ATRi or 5 mM HU for 1 h. **B.** Quantitation of  $\gamma$ H2AX in proliferating CD8<sup>+</sup> T cells  
1036 treated with 6  $\mu$ M thymidine for 2 h followed by 5  $\mu$ M ATRi for 2 h or 4 h (upper).  $\gamma$ H2AX versus  
1037 DNA plots of proliferating CD8<sup>+</sup> T cells treated with 6  $\mu$ M thymidine for 2 h followed by 5  $\mu$ M ATRi  
1038 for 2 h (lower). **C.** B16 and proliferating CD8<sup>+</sup> T cells were treated with 10  $\mu$ M camptothecin  
1039 (TOP1i) or 5  $\mu$ M ATRi for 1 h. Genomic DNA was prepared and digested with restriction  
1040 endonucleases, +/-RNASE H. DNA fragments were immunopurified with anti-RNA-DNA hybrid  
1041 antibody (S9.6). Immunopurified DNA was denatured and dot blotted using an anti-single-  
1042 stranded DNA antibody. **D.** Representative images from the PLA of Pol II phosphoserine 5 and  
1043 PCNA in proliferating CD8<sup>+</sup> T cells treated with 5  $\mu$ M ATRi for 30 min. 10  $\mu$ M EdU was added  
1044 during the last 15 min of treatment. **E.** Quantitation of PLA described in panel D. **F.** Cartoon  
1045 summarizing the mechanisms through which ATRi induces genome instability in CD8<sup>+</sup> T cells. **A-B,**

1046 **E.** Mean and SD bars shown. **A.** \*:  $P < 0.05$ , \*\*:  $P < 0.01$ , \*\*\*:  $P < 0.001$ , \*\*\*\*:  $P < 0.0001$  by one-  
1047 way ANOVA with Dunnett multiple comparisons. **B and E.** \*:  $P < 0.05$ , \*\*:  $P < 0.01$ , \*\*\*:  $P < 0.001$ ,  
1048 \*\*\*\*:  $P < 0.0001$  by one-way ANOVA with Tukey's multiple comparisons.

1049



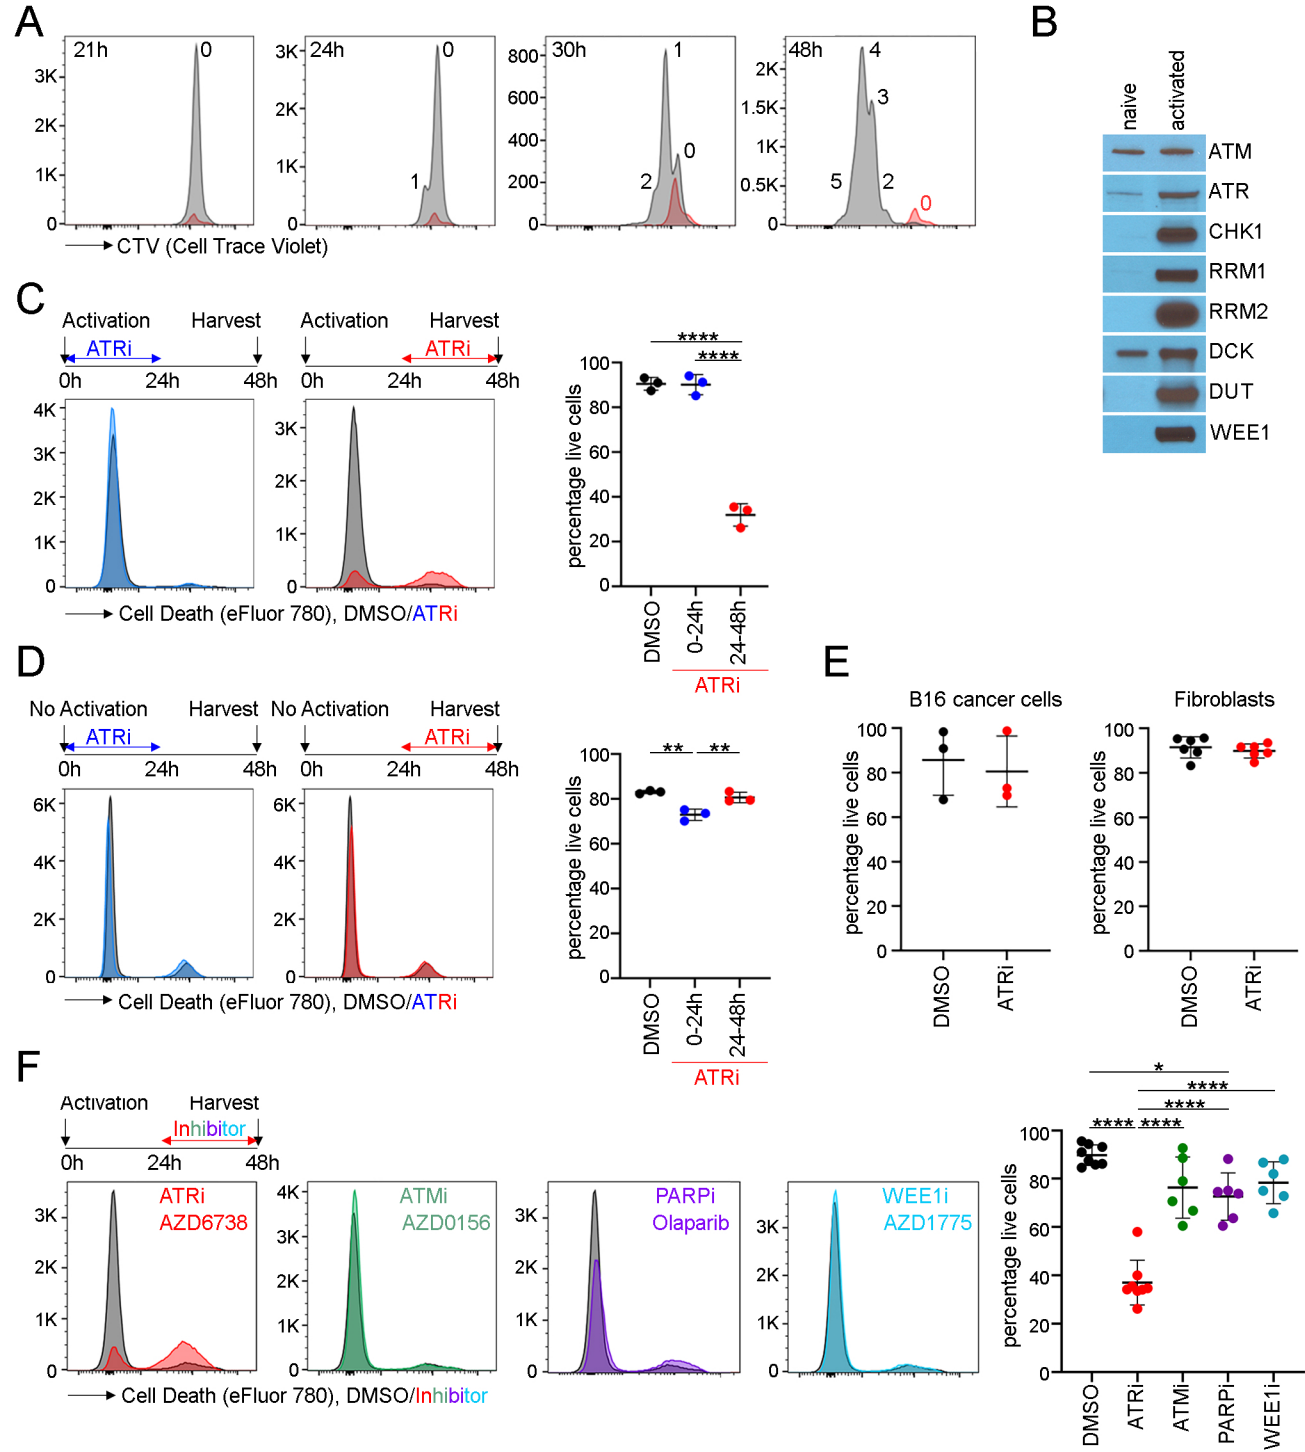

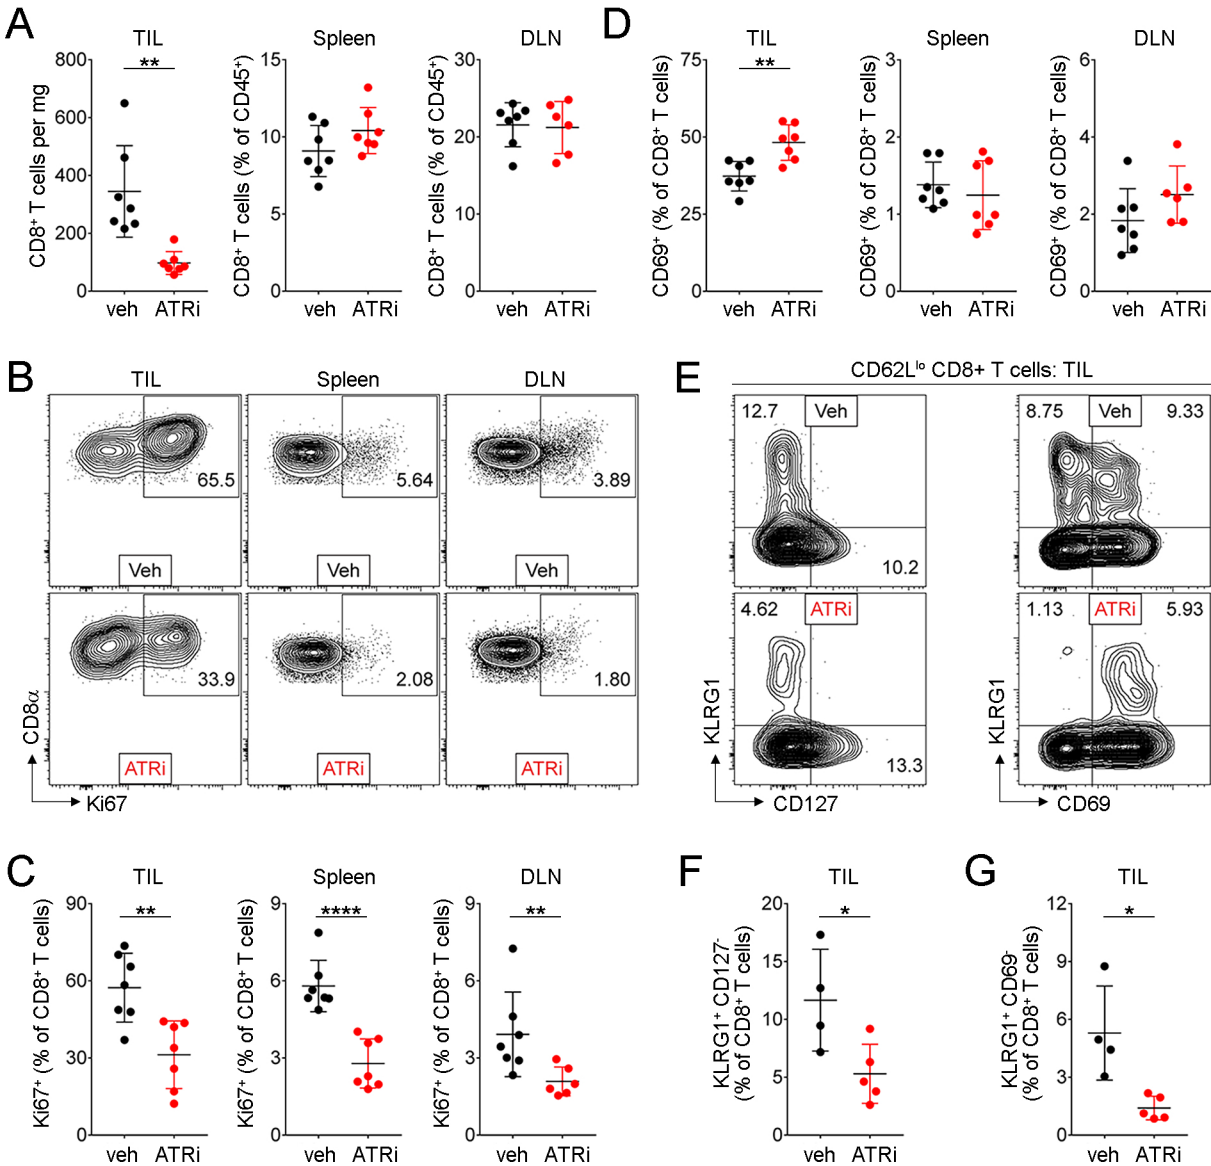

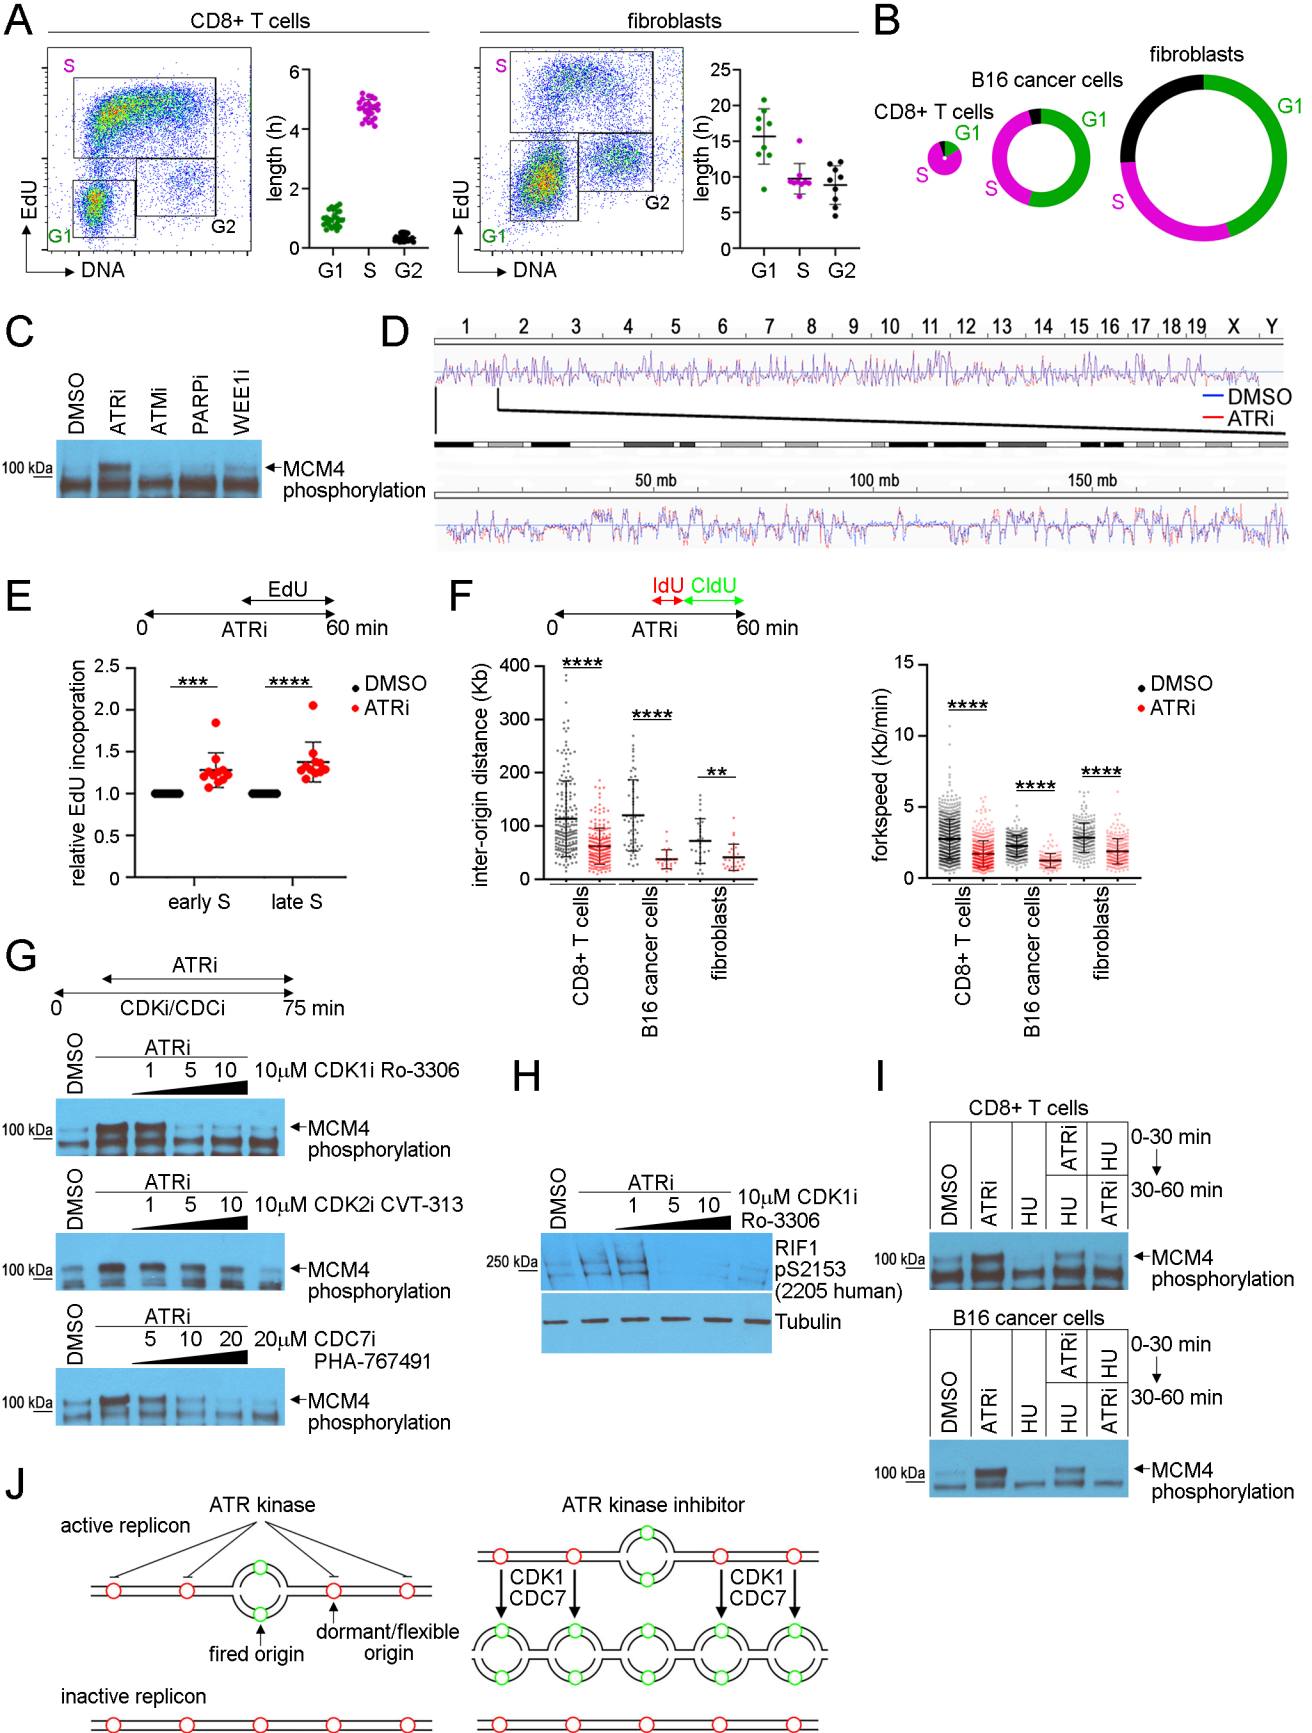

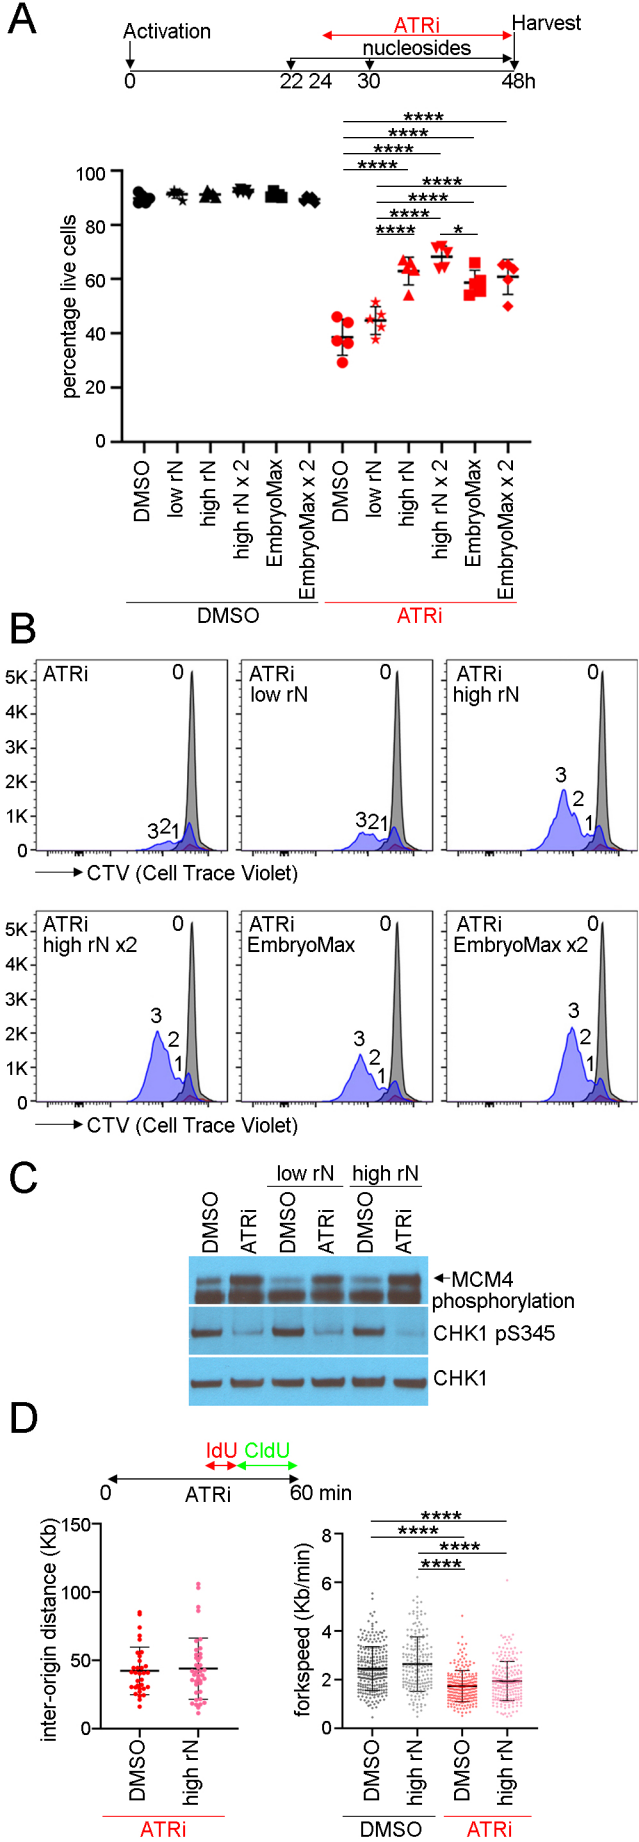

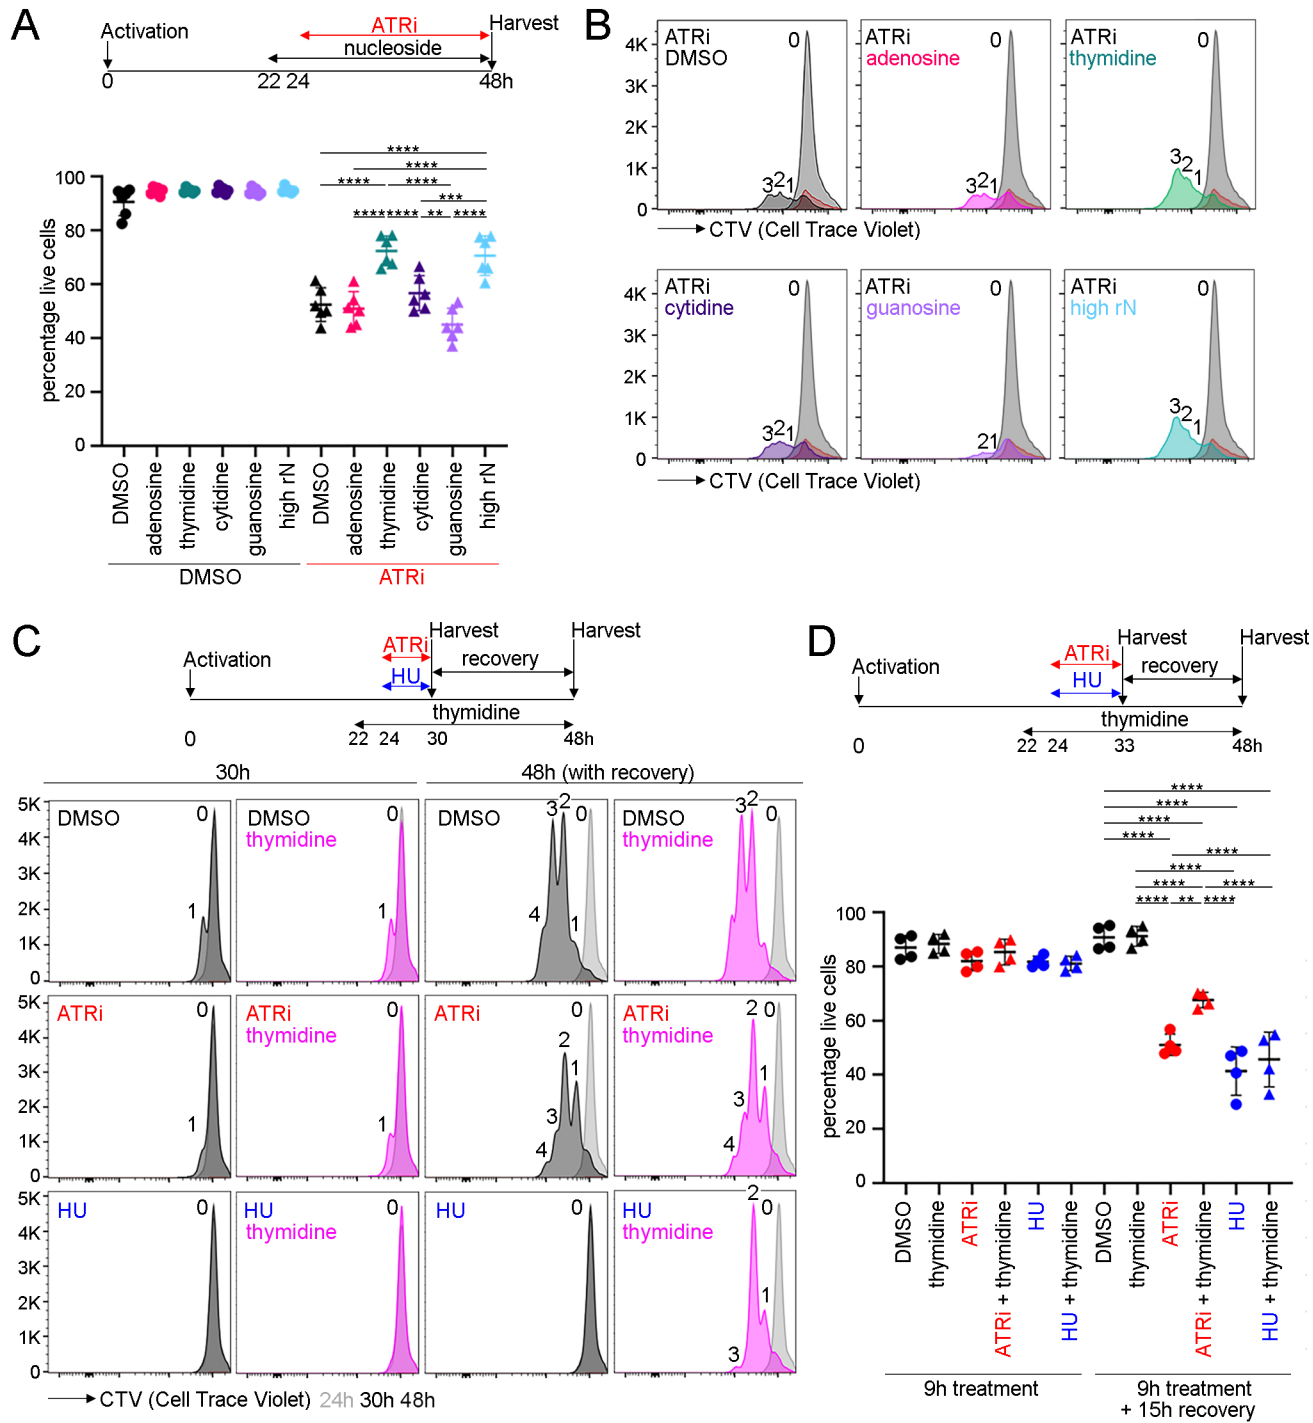

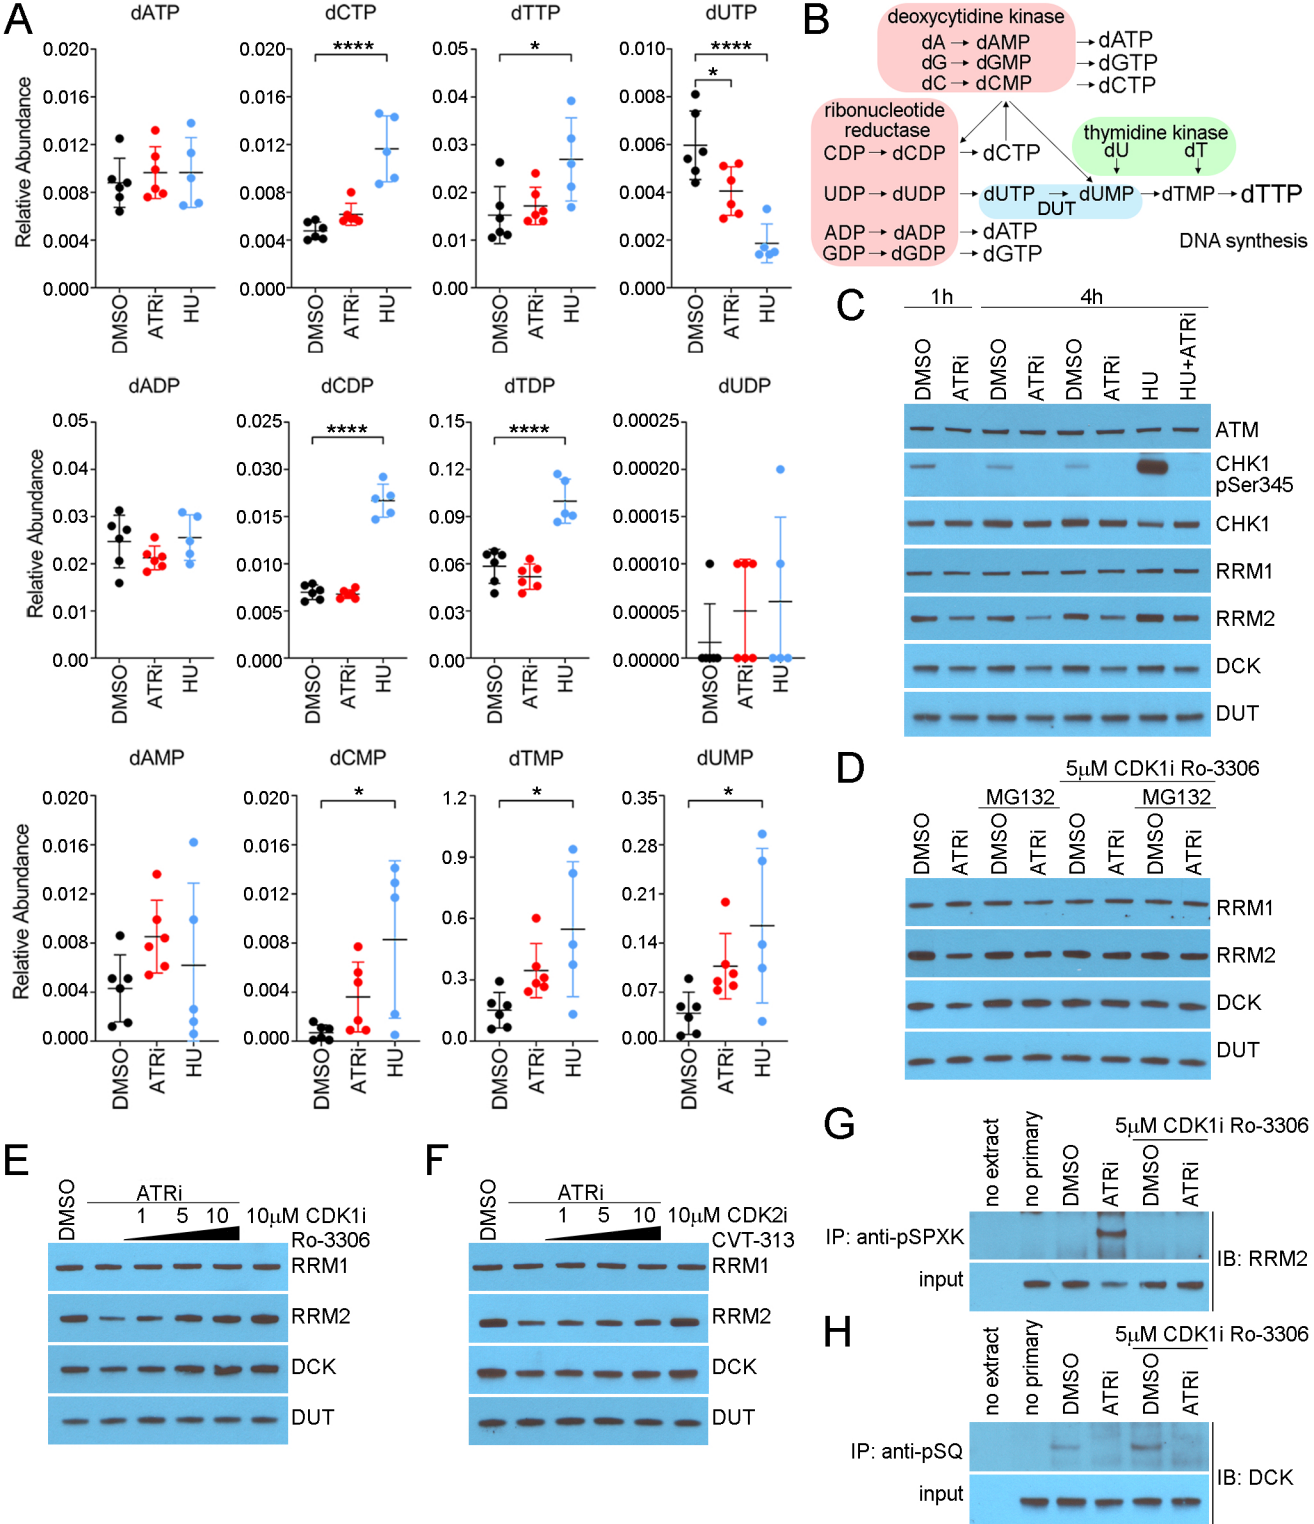







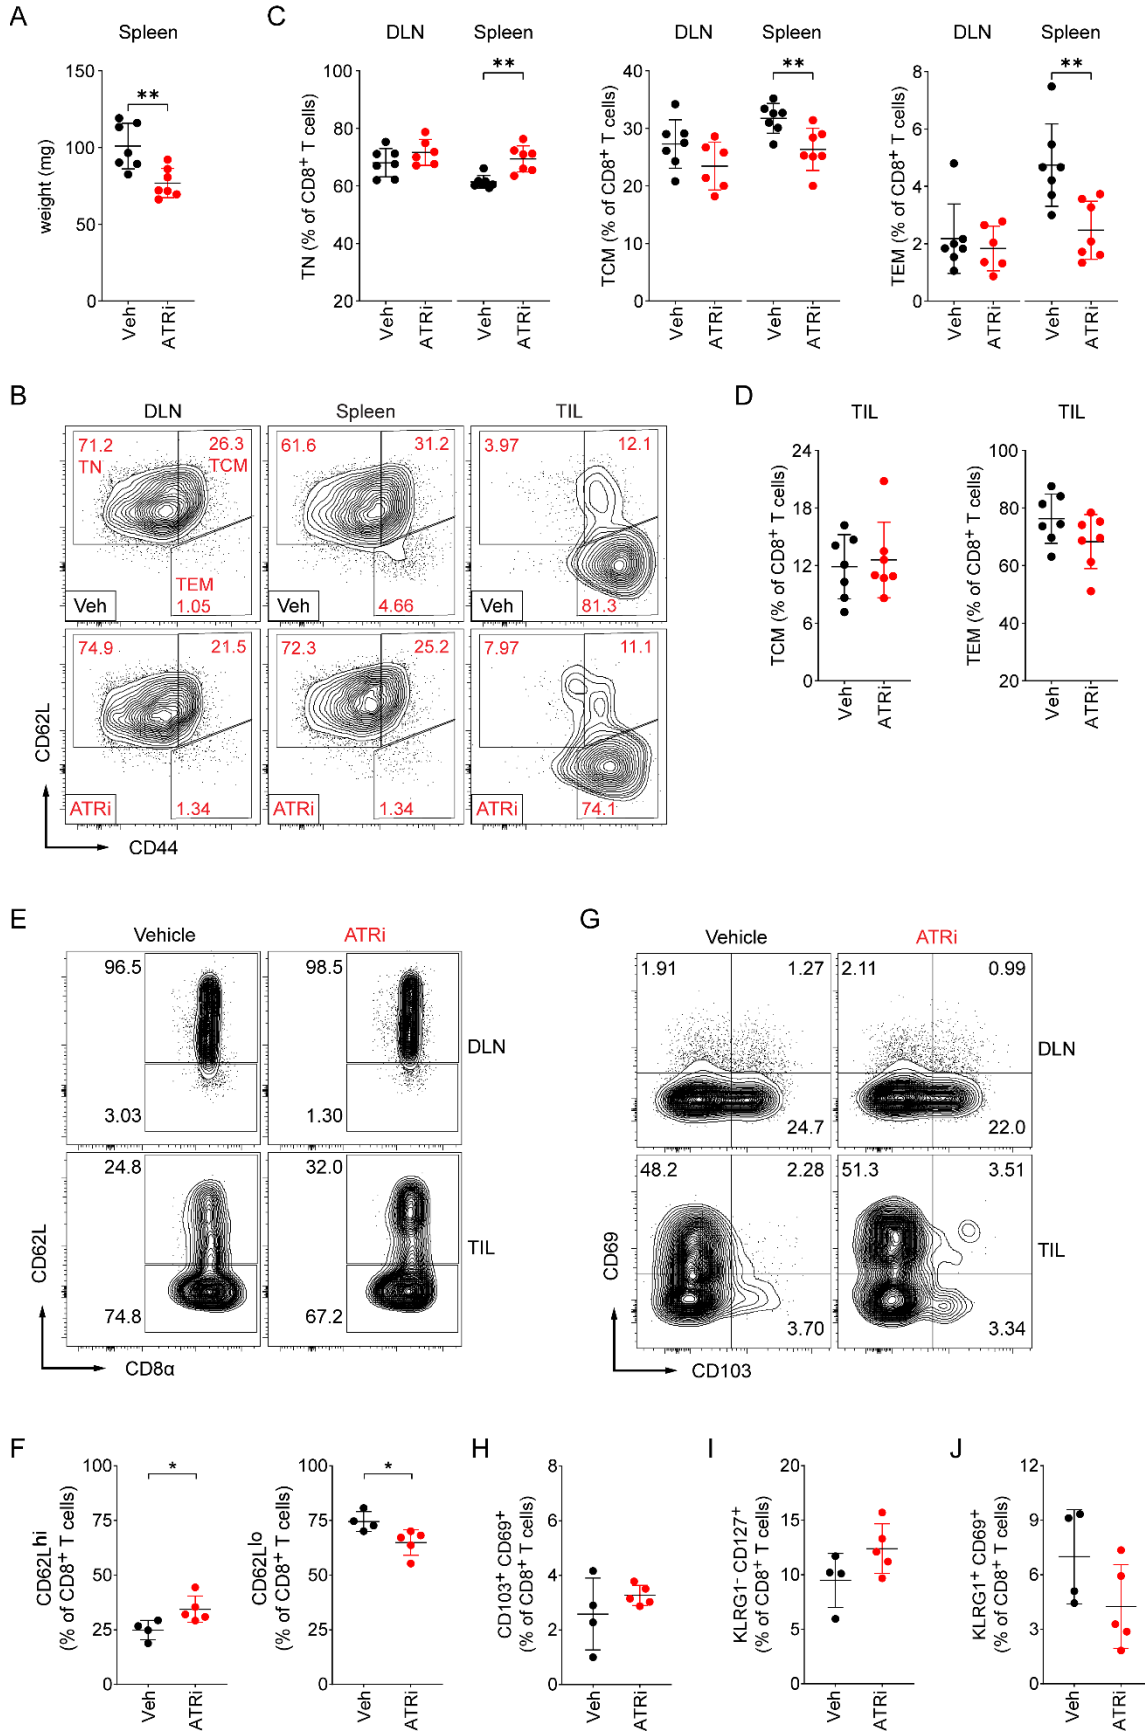

**Figure S1: A.** Weight of whole spleens harvested on day 4 from CT26 tumor bearing mice treated with ATRi (75 mg/kg AZD6738) or vehicle (Veh) on days 1-3. **B-J.** Immunoprofiling of tissues harvested on day 4 from CT26 tumor bearing mice treated with ATRi (75 mg/kg AZD6738) or vehicle (Veh) on days 1-3. **B.** Representative contour plots of CD8<sup>+</sup> T cells with naïve (TN, CD62L<sup>hi</sup>CD44<sup>lo</sup>), central memory (TCM, CD62L<sup>hi</sup>CD44<sup>hi</sup>), and effector/effector memory (TEM, CD62L<sup>lo</sup>CD44<sup>hi</sup>) phenotypes in the tumor-draining lymph node (DLN), spleen, and tumor infiltrate (TIL). **C.** Quantitation of TN, TCM, and TEM CD8<sup>+</sup> T cells in the DLN and spleen. **D.** Quantitation of TCM and TEM CD8<sup>+</sup> T cells in the TIL. **E.** Representative contour plots of CD62L expression on CD8<sup>+</sup> T cells in the tumor-draining lymph node (DLN) and tumor infiltrate (TIL). **F.** Quantitation of CD62L<sup>hi</sup> and CD62L<sup>lo</sup> CD8<sup>+</sup> T cells in the TIL. **G.** Representative contour plots of CD69 and CD103 expression on CD8<sup>+</sup> T cells in the DLN and TIL. **H.** Quantitation of CD103<sup>+</sup>CD69<sup>+</sup> (tissue resident) CD8<sup>+</sup> T cells in the TIL. **I.** Quantitation of KLRG1<sup>+</sup>CD127<sup>+</sup> CD62L<sup>lo</sup> (memory precursor effector) CD8<sup>+</sup> T cells (as a percentage of total CD8<sup>+</sup> T cells) in the TIL. **J.** Quantitation of KLRG1<sup>+</sup>CD69<sup>+</sup> CD62L<sup>lo</sup> CD8<sup>+</sup> T cells (as a percentage of total CD8<sup>+</sup> T cells) in the TIL. **A-D.** n = 7 mice total per group (6 DLN for ATRi) from 2 independent experiments, each with 3-4 mice per group. **E-J.** n = 4 (Veh) or 5 (ATRi) mice. **A, C, D, F, H-J.** Mean and SD bars shown. \*: P < 0.05, \*\*: P < 0.01 by two-tailed, unpaired t-test. Brackets not shown for comparisons that were not statistically significant.

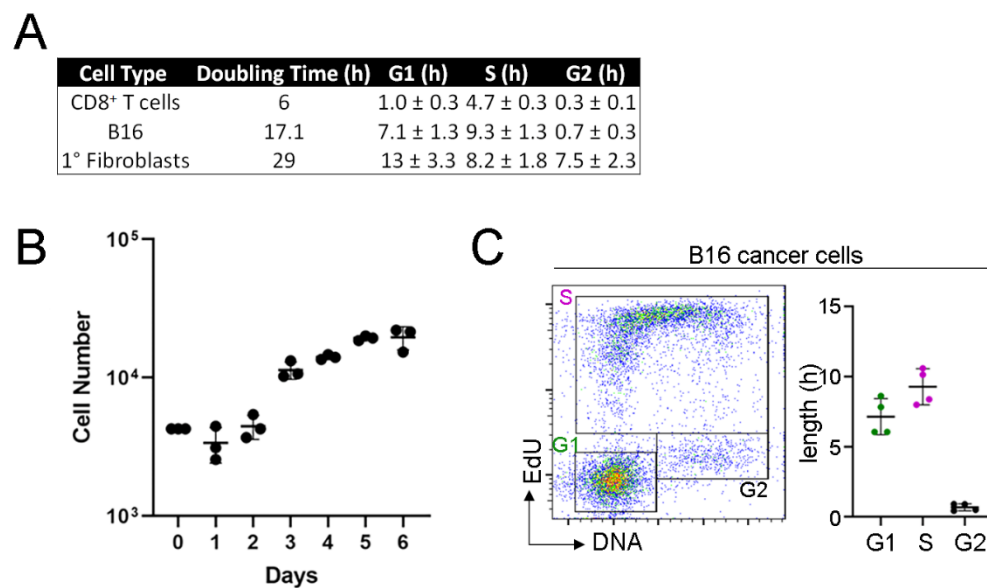

**Figure S2: A.** Summary of doubling times and estimated lengths of G1, S, and G2 phases in CD8<sup>+</sup> T cells, B16, and primary fibroblasts. The percentage of cells in each cell cycle phase and the doubling time was used to estimate the length of G1, S, and G2/M. **B.** Doubling time of B16 was previously reported (Danciu et al., 2013; Fidler, 1975) while that of primary fibroblasts was calculated with the equation  $(t_2 - t_1)/(3.32 \cdot \log(n_2/n_1))$  using linear part of the growth curve.  $n_1$  is the cell number at the time point  $t_1$  and  $n_2$  is the cell number at the time point  $t_2$ . **C.** EdU versus DNA histograms of B16. Mean and SD bars shown.

Danciu, C., Falamas, A., Dehelean, C., Soica, C., Radeke, H., Barbu-Tudoran, L., Bojin, F., Pinzaru, S.C., and Munteanu, M.F. (2013). A characterization of four B16 murine melanoma cell sublines molecular fingerprint and proliferation behavior. *Cancer Cell Int* 13, 75. 10.1186/1475-2867-13-75.

Fidler, I.J. (1975). Biological behavior of malignant melanoma cells correlated to their survival in vivo. *Cancer research* 35, 218-224.

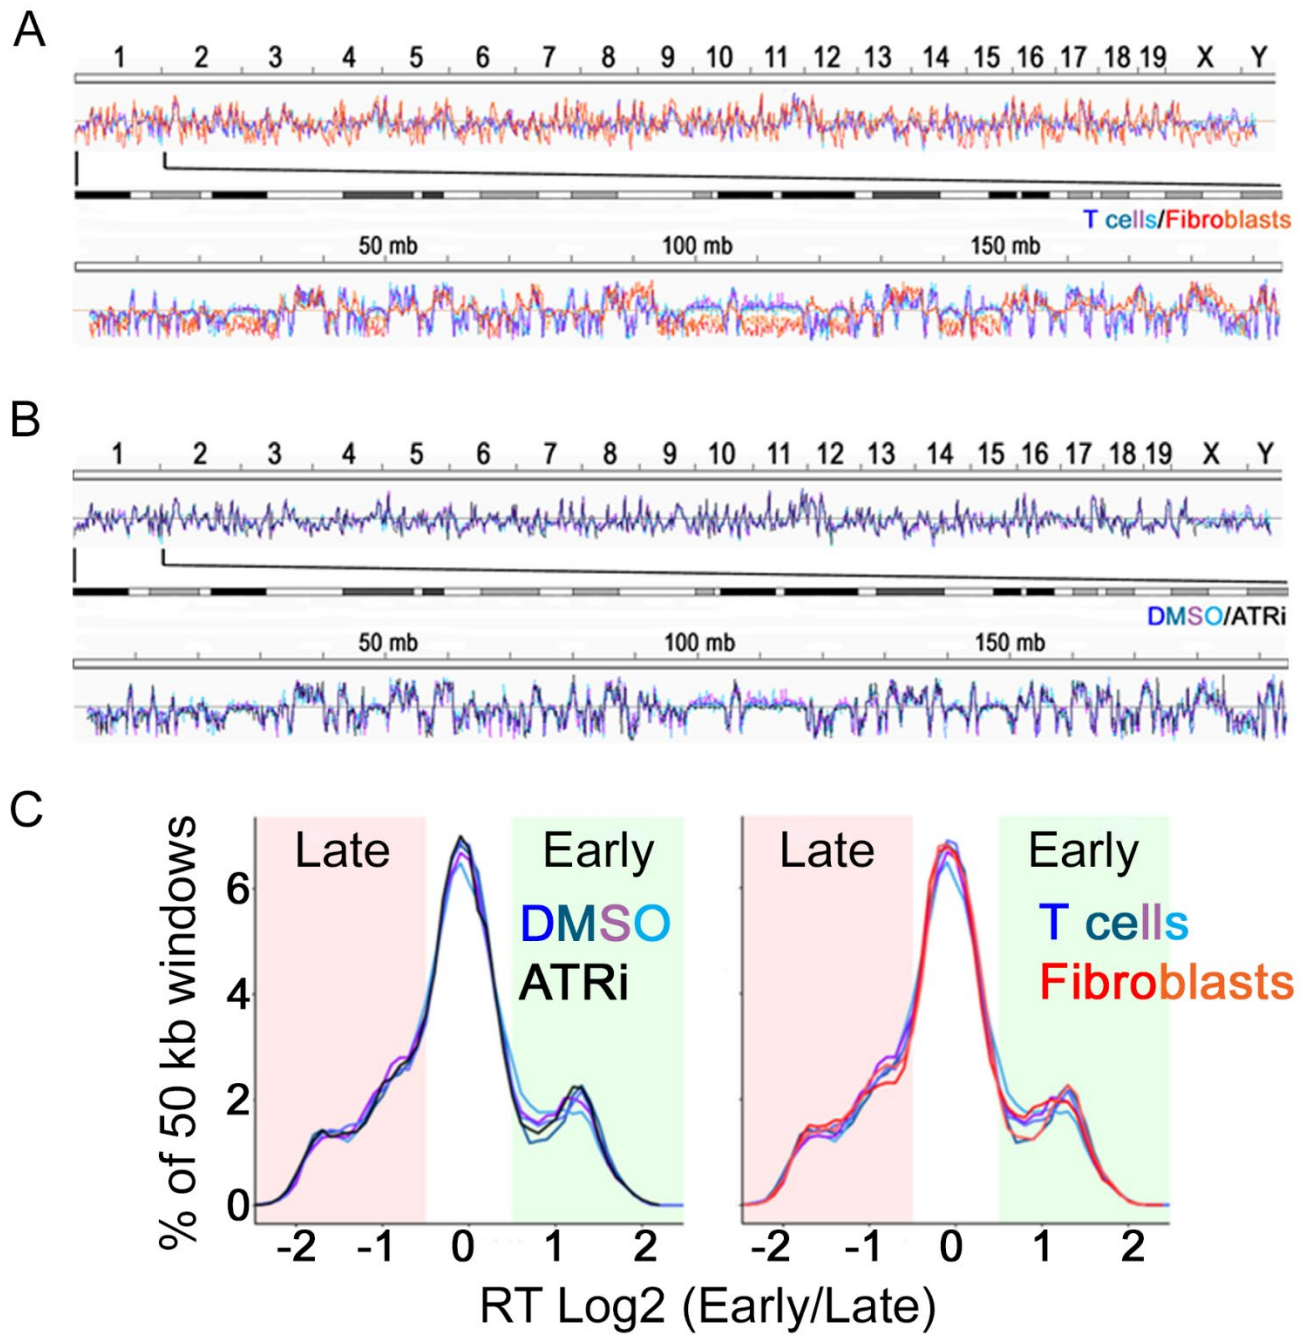

**Figure S3: A.** Repli-seq analyses of proliferating CD8<sup>+</sup> T cells (blues) and primary fibroblasts (reds). Upper – whole genome. Lower - chromosome 1. Sequencing data are deposited at GEO (code: GSE183412). **B.** Repli-seq analyses of proliferating CD8<sup>+</sup> T cells treated with DMSO (blues) or 5 μM AZD6738 (black) for 1 h. **C.** Genome-wide distribution of the replication timing of 50 kb genomic windows determined by repli-seq. Comparison of proliferating CD8<sup>+</sup> T cells treated with DMSO (blues) or 5 μM AZD6738 (black) (left panel) or proliferating CD8<sup>+</sup> T cells treated with DMSO (blues) and primary fibroblasts treated with DMSO (reds) (right panel).

| Concentration (ng/mL) | 1,000.00 | 500.00  | 250.00  | 125.00  | 62.50    | 31.25    | 15.62    | 7.81      | 3.90      | 1.95      | Blank |            |         |
|-----------------------|----------|---------|---------|---------|----------|----------|----------|-----------|-----------|-----------|-------|------------|---------|
| Dilution              | 1:1,000  | 1:2,000 | 1:4,000 | 1:8,000 | 1:16,000 | 1:32,000 | 1:64,000 | 1:128,000 | 1:256,000 | 1:512,000 | Blank | Titer      | Coating |
| 107C2-2               | 2.792    | 2.739   | 2.778   | 2.686   | 2.567    | 2.387    | 2.202    | 1.867     | 1.495     | 1.067     | 0.056 | >1:512,000 | A       |
| 107C2-2               | 0.054    | 0.057   | 0.060   | 0.055   | 0.052    | 0.057    | 0.066    | 0.052     | 0.055     | 0.058     | 0.057 | <1:1,000   | B       |

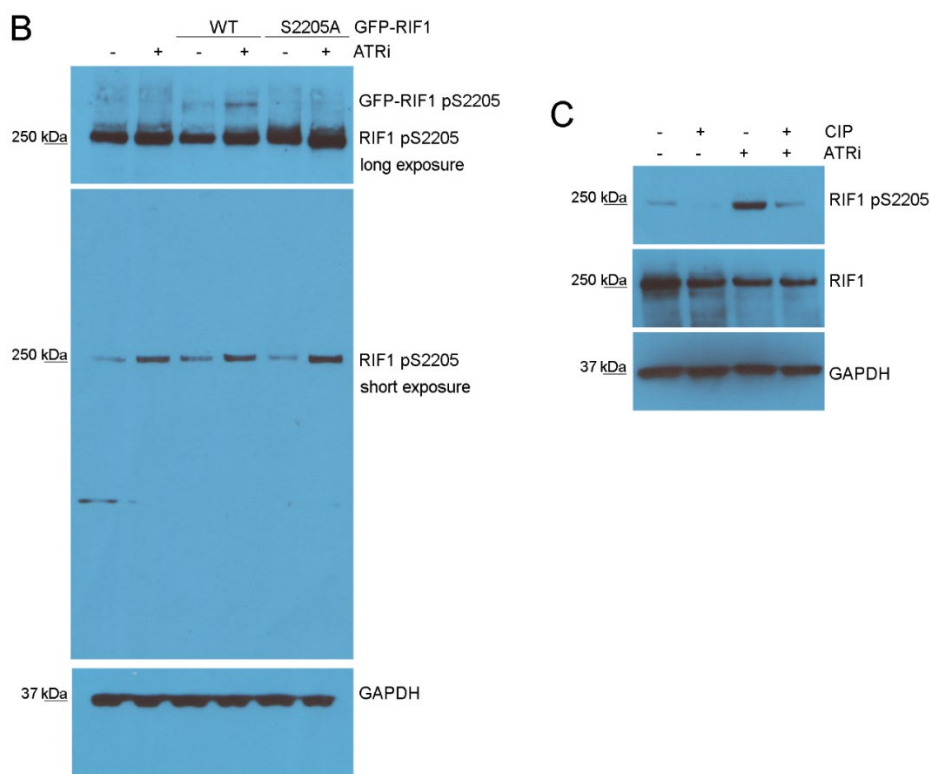

**Figure S4: A.** A rabbit monoclonal antibody was generated against a synthetic peptide CKVRRV(pSer)FADPI. ELISA of the hybridoma supernatant shows selectivity against phosphopeptide A: CKVRRV(pSer)FADPI vs. nonphosphopeptide B: CKVRRVSFADPI. **B.** GFP-RIF1 WT (wild-type) or GFP-RIF1 S2205A mutated were expressed in 293T cells. Cells were treated with ATRi for 1 h and whole cell extracts were generated and immunoblotted using the purified rabbit monoclonal antibody from A. Upper panel is a long exposure that shows that GFP-RIF1 WT, but not GFP-RIF1 S2205A mutated, is recognized by the rabbit monoclonal antibody in cells treated with ATRi. Middle panel is a typical exposure that shows that endogenous RIF1 is recognized by the rabbit monoclonal antibody in whole cell extracts of 293T cells treated with ATRi. **C.** Whole cell extracts of 293T cells treated with vehicle or ATRi were treated with calf intestinal phosphatase (CIP). RIF1 is recognized by the rabbit monoclonal antibody in whole cell extracts of 293T cells treated with ATRi and this is reversed by treatment with CIP.

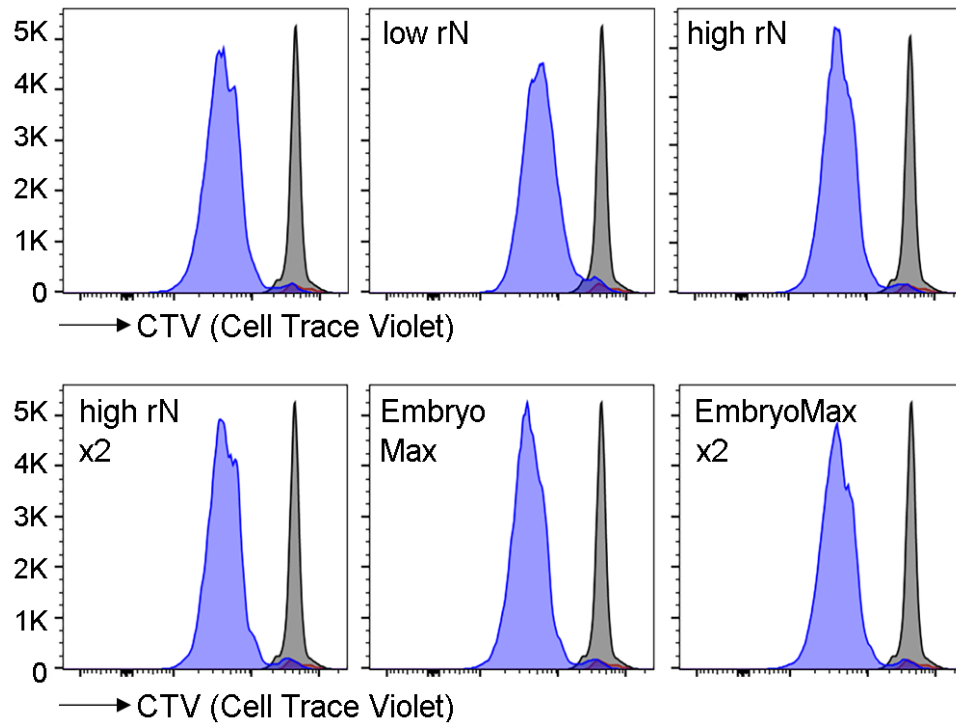

**Figure S5:**

Representative overlays of CTV (proliferation) histograms for proliferating CD8<sup>+</sup> T cells treated with DMSO and different nucleosides analyzed at 24 h (gray) or 48 h (blue), corresponding to Figure 4A. Red histogram represent unactivated samples. CTV histograms are within live, CD44<sup>hi</sup>CD8<sup>+</sup> gates.



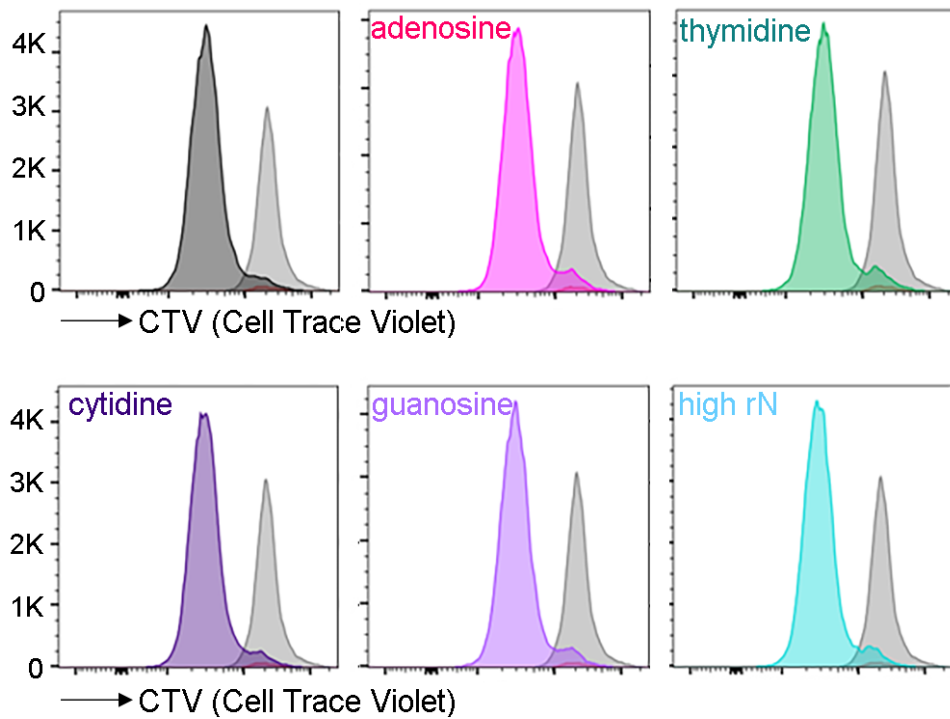

**Figure S6:** Representative overlays of CTV (proliferation) histograms for proliferating CD8<sup>+</sup> T cells treated with DMSO and different nucleosides analyzed at 24 h (gray) or 48 h (blue), corresponding to Figure 5A. Red histogram represent unactivated samples. CTV histograms are within live, CD44<sup>hi</sup>CD8<sup>+</sup> gates.

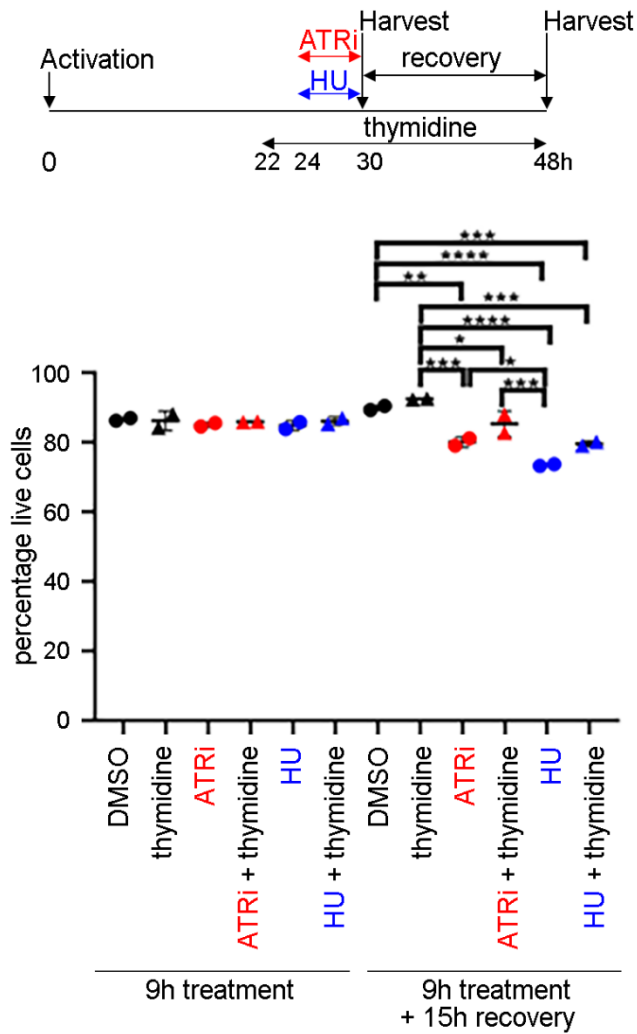

**Figure S7:** Percentage of live CD8<sup>+</sup> T cells (eFluor 780<sup>-</sup>CD8<sup>+</sup>TCRβ<sup>+</sup>) was quantitated for the experiment described in Figure 5C. Mean and SD bars shown. Statistics represent one-way ANOVA with Tukey's multiple comparisons where \*: P < 0.05, \*\*: P < 0.01, \*\*\*: P < 0.001, \*\*\*\*: P < 0.0001. Brackets not shown for comparisons that were not statistically significant and between DMSO and ATRi treated samples for clarity.

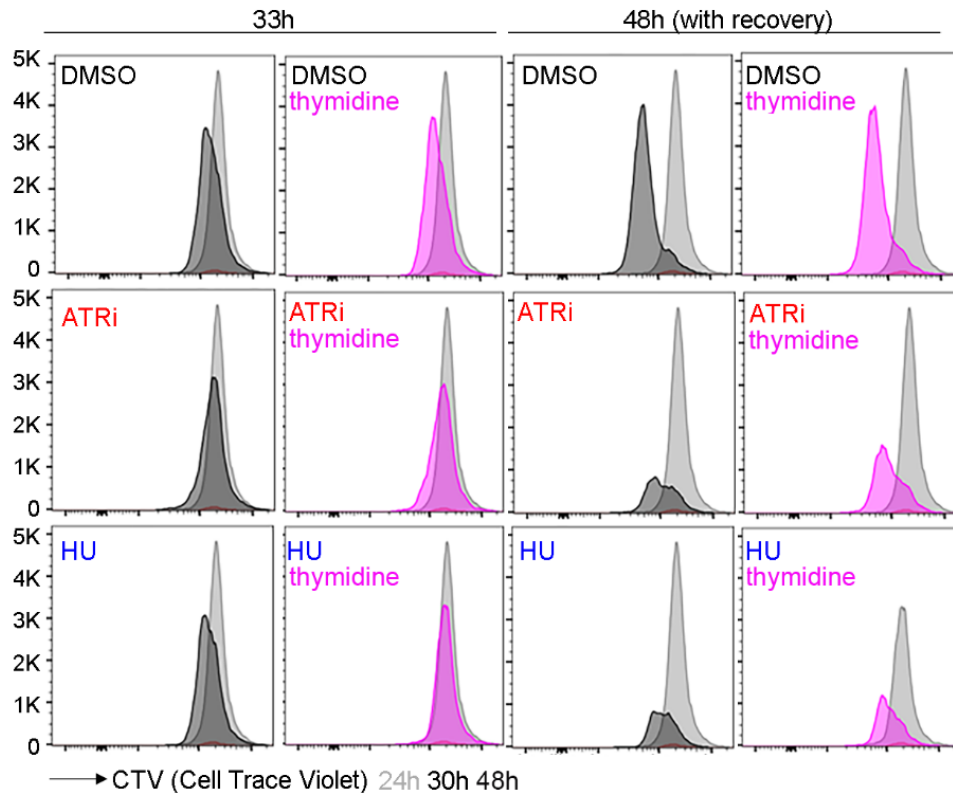

**Figure S8:** Representative overlays of CTV (proliferation) histograms at 24 h (gray), 33 h or 48 h post stimulation for proliferating CD8<sup>+</sup> T cells treated with ATRi or HU and DMSO (black) or thymidine (pink), corresponding to the experiment described in Figure 5D. CTV histograms are within live, CD44<sup>hi</sup>CD8<sup>+</sup> gates.

## SUPPLEMENTAL METHODS

**Table SM1: Antibodies used in this work.**

| Antibody                                               | Dilution | Manufacturer   | Catalog # |
|--------------------------------------------------------|----------|----------------|-----------|
| <b>CD8<sup>+</sup> T cell activation</b>               |          |                |           |
| Anti-mouse CD28                                        |          | BD Biosciences | 553294    |
| Anti-mouse CD3E                                        |          | BioLegend      | 100331    |
| <b>Proliferation/ survival assay</b>                   |          |                |           |
| AF647 anti-mouse CD44 (IM7)                            | 1:500    | BioLegend      | 103018    |
| PE anti-mouse CD8 $\alpha$ (53-6.7)                    | 1:250    | BioLegend      | 100708    |
| AF488 anti-mouse TCR- $\beta$ (H57-597)                | 1:250    | BioLegend      | 10925     |
| <b><i>In vivo</i> immunophenotyping</b>                |          |                |           |
| BV650 anti-mouse CD4 (clone GK1.5)                     | 1:500    | BD Biosciences | 563232    |
| BV786 anti-mouse CD62L (clone MEL-14)                  | 1:1000   | BD Biosciences | 564109    |
| AF488 anti-mouse TCR- $\beta$ (H57-597)                | 1:250    | BioLegend      | 109215    |
| AF647 anti-mouse Ki67 (clone 16A8)                     | 1:200    | BioLegend      | 652408    |
| BV421 anti-mouse CD69 (clone H1.2F3)                   | 1:250    | BioLegend      | 104545    |
| BV510 anti-mouse CD4 (clone GK1.5)                     | 1:500    | BioLegend      | 100449    |
| BV510 anti-mouse CD45 (clone 30-F11)                   | 1:250    | BioLegend      | 103138    |
| BV650 anti-mouse CD127 (IL-7R $\alpha$ ) (clone A7R34) | 1:100    | BioLegend      | 135043    |
| PE anti-mouse/human CD44 (clone IM7)                   | 1:500    | BioLegend      | 103007    |
| PE anti mouse/human KLRG1 (MAFA) (clone 2F1/KLRG1)     | 1:250    | BioLegend      | 138407    |
| PE-Cy7 anti-mouse CD8 $\alpha$ (clone 53-6.7)          | 1:250    | BioLegend      | 100721    |
| PerCP-Cy5.5 anti-mouse CD103 (clone 2E7)               | 1:50     | BioLegend      | 121416    |
| TruStain FcX PLUS anti-mouse CD16/32 (clone S17011E)   | 1:100    | BioLegend      | 156604    |
| AF647 anti-mouse CD8 (clone KT15)                      | 1:500    | MBL Intl       | D271-A64  |
| <b>Western blot</b>                                    |          |                |           |
| ATM (D2E2)                                             | 1:1000   | Cell Signaling | 2873      |
| ATR                                                    | 1:1000   | Cell Signaling | 2790      |
| CHK1 (2G1D5)                                           | 1:1000   | Cell Signaling | 2360      |
| Phospho-CHK1 (S345) (133D3)                            | 1:1000   | Cell Signaling | 2348      |
| RRM1                                                   | 1:1000   | Cell Signaling | 3388      |
| RRM2 (N1C1)                                            | 1:1000   | GeneTex        | GTX103193 |
| DCK                                                    | 1:1000   | Abcam          | ab96599   |
| DUT                                                    | 1:1000   | LSBio          | LS-C80791 |
| WEE1 (D10D2)                                           | 1:1000   | Cell Signaling | 13084     |
| MCM4 (D3H6N)                                           | 1:1000   | Cell Signaling | 12973     |
| $\alpha$ -Tubulin                                      | 1:1000   | Cell Signaling | 2144      |
| RIF1 pS2205 (CUSTOM)                                   | 1:5000   | Genescript     | 107C2-2   |
| ssDNA                                                  | 1:1000   | Millipore      | MAB3034   |

| <b>DNA Combing</b>                                      |          |                |          |
|---------------------------------------------------------|----------|----------------|----------|
| IdU (BrdU)                                              | 1:20     | BD Biosciences | 347580   |
| CldU (BrdU)                                             | 1:50     | abcam          | ab6326   |
| ssDNA                                                   | 1:50     | Millipore      | MAB3034  |
| anti-mouse AF594                                        | 1:50     | Invitrogen     | A11005   |
| anti-rat AF488                                          | 1:50     | Invitrogen     | A21470   |
| anti-mouse AF647                                        | 1:50     | Invitrogen     | A21235   |
| <b>Immunoprecipitation</b>                              |          |                |          |
| Phospho-MAPK/CDK Substrates (PXS*P or S*PXR/K) (34B2)   | 1:50     | Cell Signaling | 2325     |
| Phospho-ATM/ATR Substrate (S*Q) (D23H2/D69H5) MultiMab™ | 1:50     | Cell Signaling | 9607     |
| S9.6                                                    |          | Millipore      | MABE1095 |
| <b>PLA</b>                                              |          |                |          |
| PCNA                                                    | 1:5000   | Abcam          | ab92552  |
| phospho-RNA polymerase II (S5)                          | 1:100000 | Abcam          | ab5408   |
| <b>γH2AX flow cytometry</b>                             |          |                |          |
| FITC anti-mouse γH2AX                                   | 1:250    | BioLegend      | 613404   |

**Table SM2: Reagents used for the quantitation of free nucleotides by LC-HRMS.**

| <b>Reagent</b>                           | <b>Manufacturer</b>      | <b>Catalog #</b> |
|------------------------------------------|--------------------------|------------------|
| Optima LC-MS grade water                 | Thermo Fisher Scientific | W6-4             |
| Optima LC-MS grade acetonitrile          | Thermo Fisher Scientific | A955-4           |
| Optima LC-MS grade methanol              | Thermo Fisher Scientific | A456-4           |
| 1,1,1,3,3,3-hexafluoro 2-propanol (HFIP) | Sigma-Aldrich            | 105228           |
| Diisopropylethylamine (DIPEA)            | Sigma-Aldrich            | D125806          |
| AMP standard                             | Sigma-Aldrich            | 1930             |
| dAMP standard                            | Sigma-Aldrich            | D6375            |
| ATP standard                             | Sigma-Aldrich            | A26209           |
| dATP standard                            | Sigma-Aldrich            | D6500            |
| dTMP standard                            | Sigma-Aldrich            | T7004            |
| dTTP standard                            | Sigma-Aldrich            | T0251            |
| CMP standard                             | Sigma-Aldrich            | C1006            |
| dCMP standard                            | Sigma-Aldrich            | D7625            |
| CTP standard                             | Sigma-Aldrich            | C1506            |
| dCTP standard                            | Sigma-Aldrich            | D4635            |
| UMP standard                             | Sigma-Aldrich            | U6375            |

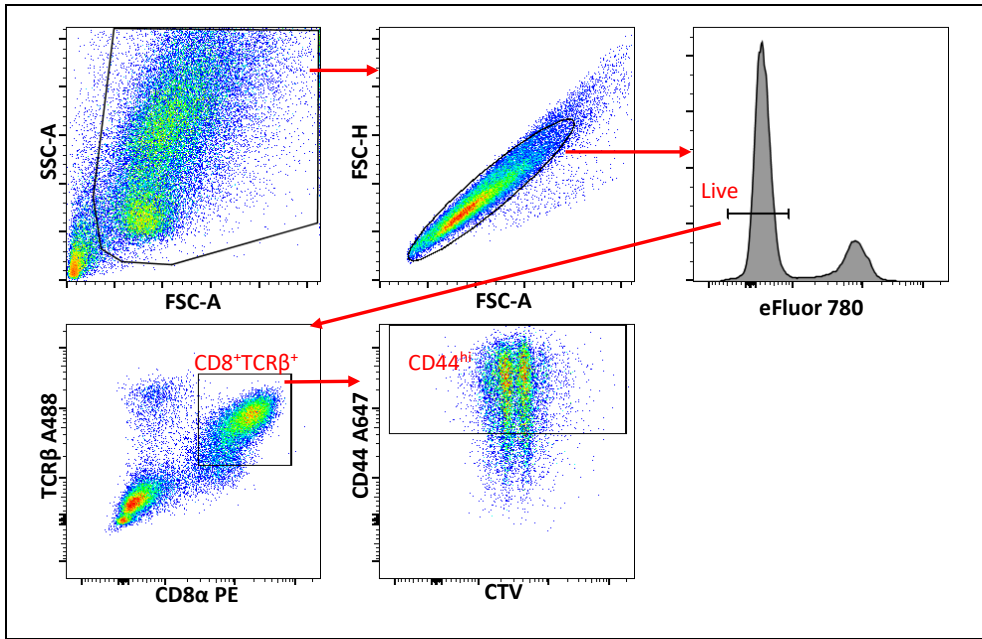

**Figure SM1: Flow cytometry gating strategy for CD8<sup>+</sup> T cells *ex vivo*.**

Any unstable portions of the run were gated out prior to analysis. *Ex vivo* cultured CD8<sup>+</sup> T cells were gated first with scatter gating (FSC-A vs. SSC-A) to exclude debris followed by single cell gating (FSC-A vs. FSC-H) to remove doublets/clumps. For proliferation assay, CD8<sup>+</sup> T cells were identified as CD8<sup>+</sup>TCRβ<sup>+</sup> cells within live population. CTV proliferation dye dilution was further characterized in CD44<sup>hi</sup> population within these cells.

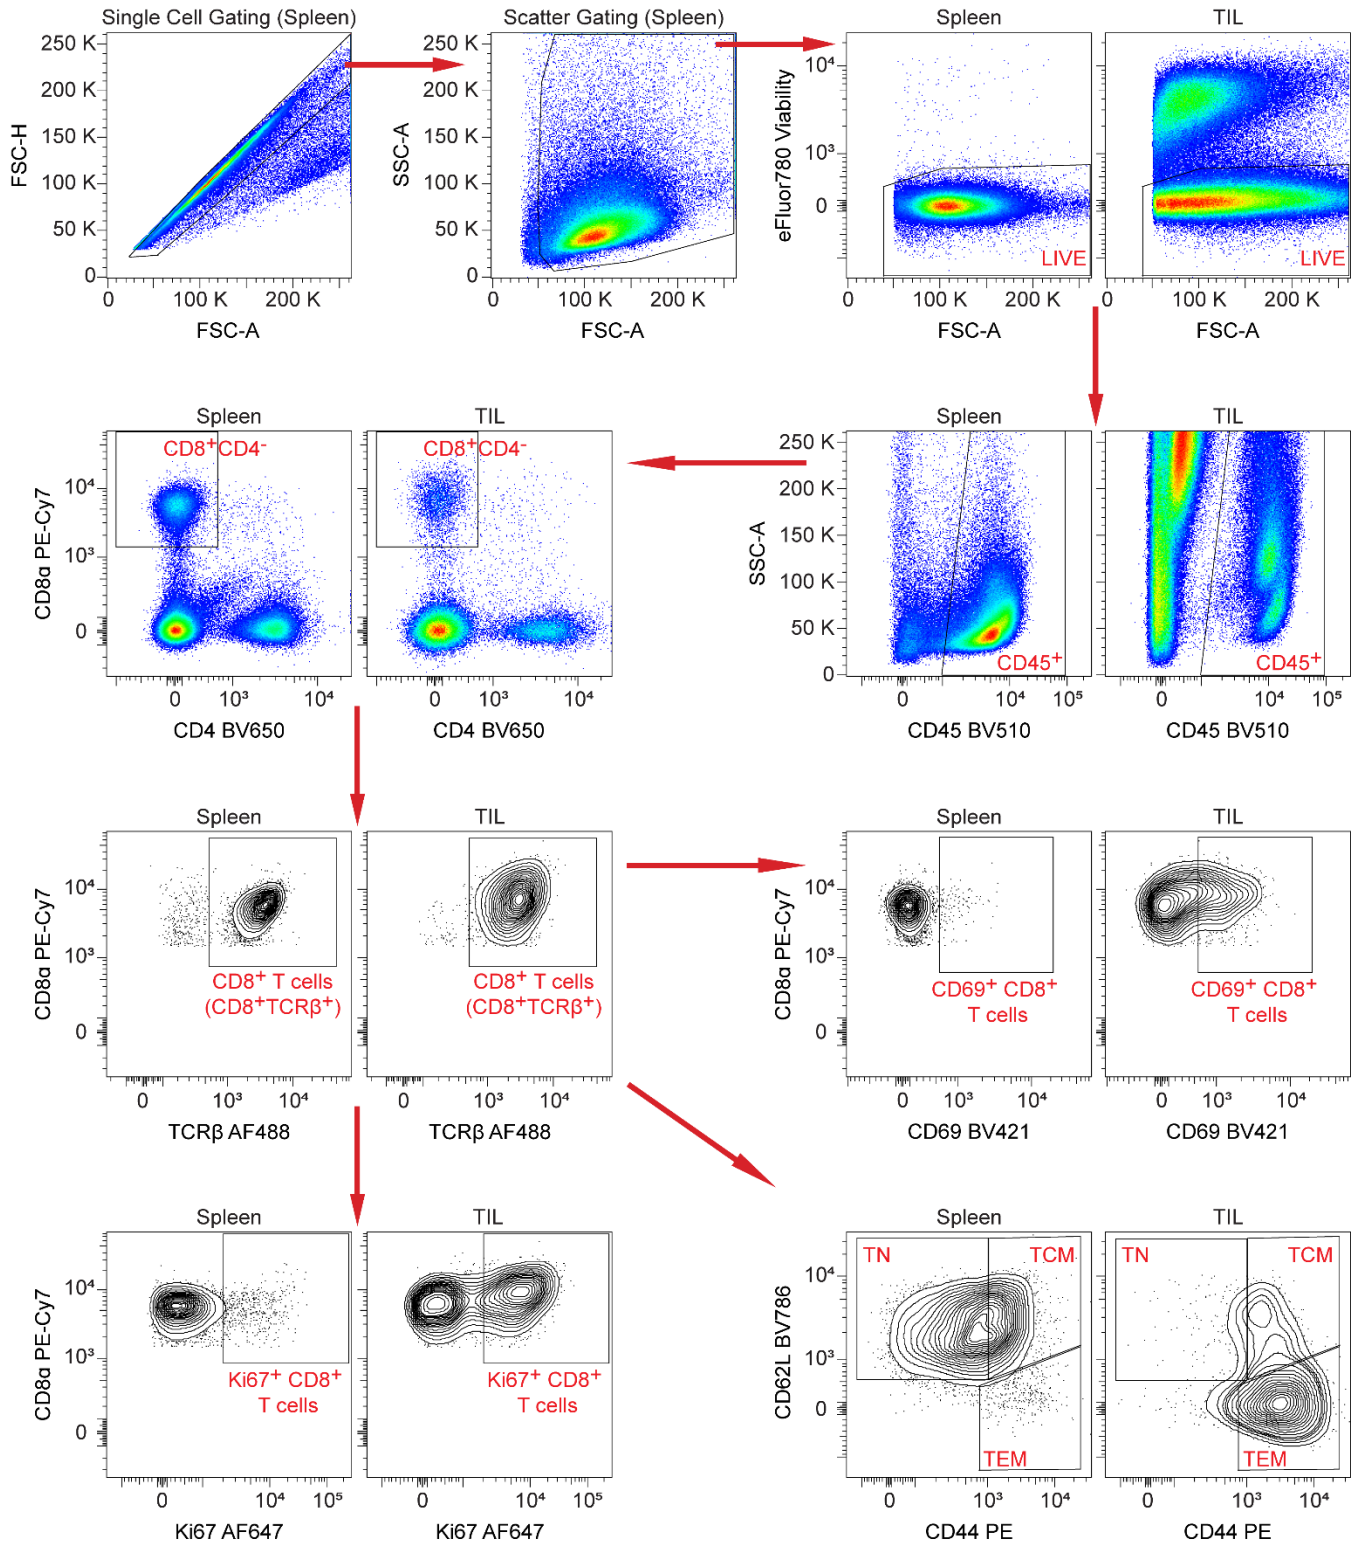



## Supplemental Figure SM2.

Flow cytometry gating strategy for CD8<sup>+</sup> T cell profiling in spleen, TIL, and DLN. Any unstable portions of the run were gated out prior to analysis. After single cell gating (FSC-A vs. FSC-H) to remove doublets/clumps and scatter gating (FSC-A vs. SSC-A) to exclude debris, CD8<sup>+</sup> T cells were identified as CD8<sup>+</sup>CD4<sup>-</sup>TCRβ<sup>+</sup> cells within the live, CD45<sup>+</sup> immune cell population. CD8<sup>+</sup> T cells were further profiled to identify proliferating (Ki67<sup>+</sup>), newly activated (CD69<sup>+</sup>), naïve (TN, CD62L<sup>lo</sup>CD44<sup>lo</sup>), central memory (TCM, CD62L<sup>hi</sup>CD44<sup>hi</sup>), and effector/effector memory (CD62L<sup>lo</sup>CD44<sup>hi</sup>) CD8<sup>+</sup> T cells. Example plots are shown for spleen and TIL for all gating following single cell and scatter gating.

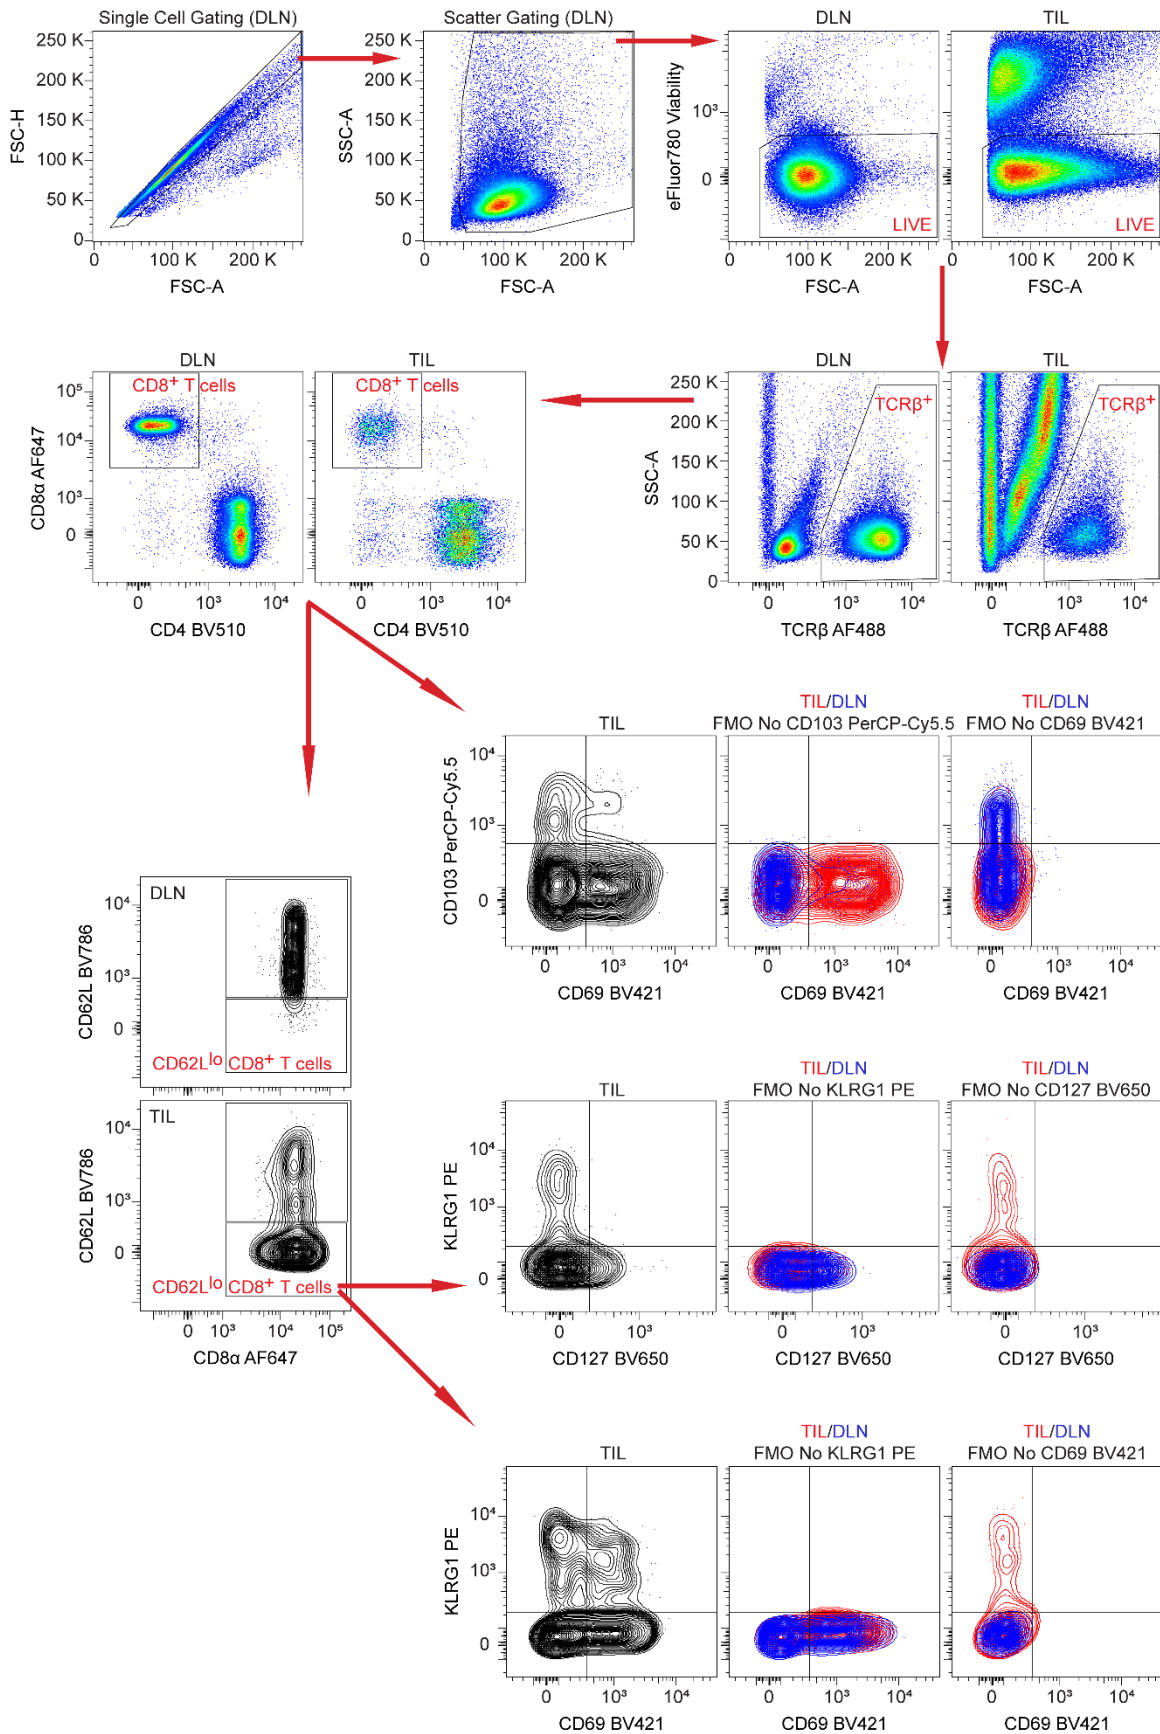

### Supplemental Figure SM3.

Flow cytometry gating strategy for effector CD8<sup>+</sup> T cell profiling in TIL and DLN. Any unstable portions of the run were gated out prior to analysis. After single cell gating (FSC-A vs. FSC-H) to remove doublets/clumps and scatter gating (FSC-A vs. SSC-A) to exclude debris, CD8<sup>+</sup> T cells were identified as TCRβ<sup>+</sup>CD8<sup>+</sup>CD4<sup>-</sup> cells within the live cell population. Tissue resident CD8<sup>+</sup> T cells in the TIL were identified as CD103<sup>+</sup>CD69<sup>+</sup>. Expression of CD62L was examined on CD8<sup>+</sup> T cells in the TIL and DLN, and the CD62L<sup>lo</sup> CD8<sup>+</sup> T cell population (which includes effector/effector memory CD8<sup>+</sup> T cells) in the TIL was further profiled for expression of KLRG1, CD127, and CD69 to identify short-lived/terminal effector (KLRG1<sup>+</sup>CD127<sup>-</sup>), memory precursor effector (KLRG1<sup>-</sup>CD127<sup>+</sup>), newly activated KLRG1<sup>+</sup> effector (KLRG1<sup>+</sup>CD69<sup>+</sup>), and previously activated KLRG1<sup>+</sup> effector (KLRG1<sup>+</sup>CD69<sup>-</sup>) CD8<sup>+</sup> T cells. Example plots are shown for DLN and TIL for all gating following single cell and scatter gating, and for TIL following gating of CD62L<sup>lo</sup> CD8<sup>+</sup> T cells. Both TIL and DLN fluorescence minus one (FMO) controls were used to empirically determine gating for KLRG1, CD127, and CD69, and are shown as overlaid plots (TIL in red, DLN in blue).
